1 Protective low avidity anti-tumour CD8+ T cells are selectively  
2 attenuated by regulatory T cells

3

4 Running Title: Tumour protective low avidity CD8+ T cells

5

6 Sugiyarto G.<sup>\*</sup>, Prossor D.<sup>\*</sup>, Dadas O.<sup>\*</sup>, Elliott T.<sup>\*,†</sup>, James E.<sup>\*,†</sup>

7

8 <sup>\*</sup>Centre for Cancer Immunology, University of Southampton Faculty of Medicine,

9 University Hospital Southampton, Southampton, SO16 6YD, UK and <sup>†</sup>Institute for

10 Life sciences, University of Southampton, Southampton, SO17 1BJ, UK.

11

12

13

14 **Correspondence:**

15 Edd James

16 Centre for Cancer Immunology,

17 University Hospital Southampton,

18 Tremona Road,

19 Southampton SO16 6YD

20 Tel No. +44 2381205884

21 Fax No. +44 2381205152

22 Email: [eddjames@soton.ac.uk](mailto:eddjames@soton.ac.uk)

23

24

25

26

27 This work was supported by the Cancer Research UK Programme Grant A16997

28 awarded to E.J. and T.E.

29 **Abstract**

30 Regulatory T cells (Treg) play a major role in the suppression of protective anti-  
31 tumour T cell responses. In the CT26 BALB/c murine model of colorectal carcinoma,  
32 Tregs differentially suppress responses to two characterised CD8<sup>+</sup> T epitopes, AH1  
33 and GSW11, which results in an absence of detectable IFN- $\gamma$  producing GSW11-  
34 specific T cells in the spleen and lymph nodes of tumour challenged mice. Activation  
35 of GSW11-specific T cells correlates with protection against tumour growth. Here we  
36 show that GSW11-specific T cells are in fact induced in Treg-replete, CT26-bearing  
37 mice, where they make up the majority of tumour infiltrating CD8<sup>+</sup> lymphocytes, but  
38 exhibit a dysfunctional 'exhausted' phenotype. This dysfunctional phenotype is  
39 induced early in the anti-tumour response in draining lymph nodes, spleens and  
40 tumours and is significantly more pronounced in GSW11-specific T cells compared to  
41 other tumour-specific T cell responses. Depletion of Tregs prior to tumour challenge  
42 significantly reduces the induction of exhaustion in GSW11-specific T cells and  
43 correlates with altered T cell receptor (TcR) usage. Moreover, the avidity of GSW11-  
44 specific TcRs that expanded in the absence of Tregs was significantly lower compared  
45 to TcRs of cytotoxic T lymphocyte (CTL) populations that were diminished in  
46 protective anti-tumour responses. This indicates that Tregs suppress the induction of  
47 protective anti-tumour T cell responses and may signify that the induction of low  
48 avidity T cells, while being more susceptible to exhaustion are the most efficacious in  
49 tumour rejection.

## 50 **Introduction**

51 CD8+ T cell responses directed to tumours have been shown to occur in many human  
52 cancers, where they are a positive prognostic indicator (1-5). Backed by studies in  
53 preclinical mouse models, which clearly show that CD8+ T cells are important in the  
54 clearance of tumours and may confer lifelong protection against malignancy (6, 7),  
55 immunotherapies aimed at boosting anti-tumour cytotoxic T lymphocytes (CTL) are  
56 showing promise in the clinic. Naturally occurring responses can be initiated during  
57 tumour growth to establish immunosurveillance in which a dynamic process of  
58 immunoediting can ensue; immunological pressure from anti-tumour CTL balances  
59 tumour elimination against the emergence of tumour escape variants with no  
60 accompanying net outgrowth of tumour (8). This process is responsible for shaping  
61 the immunogenicity of the tumour (9). Breakdown of this equilibrium leading to  
62 tumour outgrowth involves multiple factors, including the balance between T cell  
63 activatory (TcR engagement and co-stimulation) and inhibitory signals (exhaustion  
64 markers and immunosuppressive cytokines), and evasion of the T cell response  
65 through downregulation of antigen processing machinery or antigen loss. Therapeutic  
66 approaches designed to tip the balance back in favour of tumour elimination by  
67 providing activation agonists or blockade of inhibition is an attractive strategy that is  
68 currently investigated (reviewed in (10)). FoxP3+ CD4+ regulatory T cells (Treg) are  
69 important in establishing an immunosuppressive tumour microenvironment, and their  
70 infiltration into tumours is a negative prognostic biomarker (11) and a significant  
71 obstacle to successful immunotherapy, correlating with a poorer outcome in clinical  
72 trials (reviewed in (12)). Therefore, Treg depletion as a therapeutic option is being  
73 pursued in the clinic, based on studies in mice that showed rejection of transplanted  
74 tumours following ablation of Treg with anti-CD25 antibodies (13, 14).

75 One of the most widely used mouse models for preclinical testing of new  
76 immunotherapeutic drugs is the transplantable BALB/c derived colorectal tumour  
77 CT26 (15, 16). In this model, we have shown that depletion of Tregs induces robust  
78 protective anti-tumour immunity that effects tumour rejection in ~90% of mice,  
79 similar to responses observed in other mouse tumour models (13, 17). The CT26-  
80 immune mice developed memory CTL responses and were able to reject a second  
81 challenge with CT26 as well as tumour lines of different histological origin following  
82 recovery of Tregs to normal levels. Anti-tumour responses in these mice are focussed  
83 on two epitopes derived from *gp90*; AH1 (SPSYVYHQF, (18)) and GSW11  
84 (GGPESFYCASW, (17)). The anti-GSW11 response is more sensitive to Treg  
85 suppression *in vivo*, illustrated by the fact that functional (IFN- $\gamma$ -producing) anti-  
86 GSW11 CTL can only be detected in tumour draining lymph nodes (tdLN) in the  
87 absence of Treg whereas anti-AH1 CTL are detected whether or not Treg are present  
88 (17). Anti-GSW11 CD8+ T cells deliver the most potent anti-tumour response  
89 characterised by their ability to reject tumours expressing very low levels of antigen  
90 (13, 17).

91 To investigate the basis of differential suppression of the GSW11-specific T cell  
92 response further, we utilised peptide-specific tetramers, to detect both functional  
93 (IFN- $\gamma$ <sup>+</sup>) and inactivated (IFN- $\gamma$ <sup>-</sup>) antigen-specific T cells. We show that in Treg  
94 replete tumour-bearing mice GSW11-specific T cells made up the majority of CD8+  
95 tumour infiltrating lymphocytes (TIL), but exhibit an exhausted phenotype  
96 characterised by PD-1 expression and absence of IFN- $\gamma$  production upon stimulation.  
97 We also found that Treg depletion permitted the proliferation of GSW11-specific T  
98 cells with lower TcR/MHC avidity suggesting that this population may be more

- 99 efficacious at rejecting tumour than their higher avidity counterparts with the same  
100 epitope specificity.

## 101 **Materials and Methods**

### 102 **Mice, Antibodies and *In vivo* depletion**

103 BALB/c mice were bred under specific pathogen-free conditions in Southampton.  
104 Female or male mice (6-8 weeks old) were used in all experiments and during  
105 experimental procedures mice were housed in conventional facilities. Hybridomas  
106 secreting CD25 (PC61, rat IgG1) specific mAb have been described previously (13).  
107 For depletion, mice received intraperitoneal (i.p.) injection of 1 mg of mAb PC61 in  
108 100  $\mu$ l on days -3 and -1 prior to tumour challenge.

109

### 110 **Tumour cells and *In vivo* challenge**

111 CT26 tumour cells (American Type Culture Collection; ATCC) were maintained in  
112 RPMI (Sigma) supplemented with 10% FCS (Globepharm), 2 mM L-glutamine,  
113 penicillin/streptomycin (Sigma), 50  $\mu$ M 2-mercaptoethanol, 1 mM sodium pyruvate  
114 (Gibco-BRL) and 1mM HEPES (PAA) and confirmed to be mycoplasma free. In all  
115 experiments, mice were injected subcutaneously (s.c.) with  $10^5$  tumour cells in  
116 endotoxin-low PBS. For analysis of PD-L1 expression, tumour cells were stained with  
117  $\alpha$ -PD-L1 (10F.9G2; Biolegend) prior to s.c. injection and after 14-25 days of tumour  
118 growth. All flow cytometry data acquisition was carried out on a FACS Canto II (BD  
119 Biosciences) and all data analysed with FlowJo Software (Treestar). Tumour cells  
120 were gated on live, single cells and the proportion of PD-L1<sup>+</sup> cells assessed.

121

### 122 **DNA construct**

123 The H2-D<sup>d</sup> single chain trimer (SCT) construct incorporating a *gp120* HIV peptide (a  
124 kind gift from Dr. Keith Gould) was mutated into the GSW11 peptide via site directed  
125 mutagenesis (SDM) PCR using KOD HotStart polymerase (Merck Biosciences)

126 according to manufacturer's instructions. The transmembrane domain of H2-D<sup>d</sup> was  
127 substituted for a biotinylation site using overlapping extension PCR. In addition, a  
128 disulphide trap was incorporated into the construct (19) to tether the GSW11 peptide  
129 onto the MHC I binding groove.

130

### 131 **Tetramer generation**

132 Tetramers were produced with the help and advice of the Cancer Research  
133 UK/Experimental Cancer Medicine Centre Protein Core Facility (Cancer Sciences  
134 Unit, University of Southampton, Southampton, U.K.) with few modifications. The  
135 GSW11-SCT construct containing H2-D<sup>d</sup>,  $\beta$ 2m and GSW11 peptide was cloned into  
136 the pET-3a expression vector (Novagen) and expressed in BL-21 CodonPlus RIPL  
137 cells (Stratagene). Concentrated refolded complexes were purified on a HiLoad 26/60  
138 Superdex 200 column (GE Healthcare). Biotinylation was achieved with 50 $\mu$ M d-  
139 biotin and 1 $\mu$ g/ml biotin protein ligase (Avidity) at 16°C overnight and then passed  
140 through the column a second time. Biotinylated monomers were dialysed and  
141 subsequently stored in 16% glycerol in PBS or tetramerised by incubation with 1:4  
142 molar ratio of PE-labelled streptavidin (Thermofisher) at 4°C. Each batch of tetramers  
143 were tested for binding against the GSW11-specific T cell hybridoma, CCD2Z. For  
144 the analysis of AH1-specific T cells, AH1-specific dextramers were used  
145 (Immunodex).

146

### 147 **Isolation and analysis of antigen-specific T cells and Tregs**

148 Splens, tumour draining lymph nodes and tumours from CT26 challenged mice  
149 (Treg depleted or replete) were harvested between days 3-25 and disaggregated.  
150 CD8<sup>+</sup> T cell responses to CT26 antigens GSW11 and AH1 were assessed using

151 antigen-specific tetramers and the production of IFN- $\gamma$  following peptide stimulation.  
152 CD8<sup>+</sup> T cells, APCs and peptides/tumours were cultured together for 4 hours in the  
153 presence of brefeldin A (BD biosciences) before being stained for cell surface  $\alpha$ -CD8  
154 (63-6.7; BD biosciences), antigen-specific tetramer/dextramer,  $\alpha$ -PD-1 (RMPI-30;  
155 eBiosciences) and intracellular  $\alpha$ -IFN- $\gamma$  (XMG1.2; BD biosciences) using the  
156 Cytotfix/Cytoperm kit (BD biosciences) according to manufacturer's instructions.  
157 Cells were enumerated by flow cytometry. Numbers reported are those above the  
158 background response of T cells alone, with no peptide stimulation. Single cell CD8<sup>+</sup>  
159 lymphocytes were gated and assessed for tetramer binding and expression of IFN- $\gamma$ .  
160 For analysis of PD-1, CD8<sup>+</sup> and tetramer<sup>+</sup> were gated and assessed for PD-1 and  
161 IFN- $\gamma$  expression. Within these gates the T cell receptor clonality of GSW11-specific  
162 T cells was assessed using a panel of 15 V $\beta$ -specific antibodies (BD biosciences).  
163 First, total CD8<sup>+</sup> T cells were purified using a CD8 magnetic isolation negative  
164 selection kit (Miltenyi) according to manufacturer's instructions. Purified CD8s were  
165 stained with GSW11-specific tetramer,  $\alpha$ -V $\beta$  kit,  $\alpha$ -CD8 and analysed by flow  
166 cytometry. For the analysis of Tregs, cells were stained for cell surface  $\alpha$ -CD4 (RM-  
167 4-5; BD biosciences),  $\alpha$ -CD25 (7D4; BD biosciences),  $\alpha$ -PD-1 and  $\alpha$ -PD-L1  
168 (10F.9G2; Biolegend) and intracellular staining with  $\alpha$ -FoxP3 (FJK-16S;  
169 eBiosciences).

170

#### 171 **Tetramer competition assay**

172 Spleens and tumour draining lymph nodes were pooled from Treg depleted or replete  
173 mice. CD8<sup>+</sup> T cells were purified from disaggregated tissues using magnetic isolation  
174 by negative selection (Miltenyi). Purified CD8<sup>+</sup> T cells were incubated with 50 nM of  
175 dasatinib (New England Biolabs) to prevent TcR internalisation before staining with



176  $\alpha$ -CD8,  $\alpha$ -TCR  $\beta$ -chain (H57-597; Biolegend) and 5  $\mu$ g of PE-labelled GSW11-  
177 specific tetramers. After two washes, cells were incubated with bleached tetramer at  
178 varying ratios of the initial PE-labelled tetramers: 2.5 $\mu$ g, 5 $\mu$ g, 10 $\mu$ g or 20 $\mu$ g per test.  
179 Bleached tetramers were tested for no/minimal PE-fluorescence before use. The  $\beta$ -  
180 chain TCR staining was included to confirm the decreasing levels of PE-staining was  
181 due to the fluorescently labelled tetramer being out-competed and not due to TcR  
182 internalisation.

183

#### 184 **Statistical analysis**

185 Analyses were performed using Prism software (GraphPad, San Diego, CA). The  $p$   
186 values were calculated using either two way ANOVA with Dunnett's post-test or two-  
187 tailed unpaired t test (\* $p < 0.05$ ; \*\* $p < 0.01$ ; \*\*\* $p < 0.001$ ; \*\*\*\* $p < 0.0001$ ).

188

189

190

191 **Results**

192 *Tumour infiltrating GSW11-specific CD8<sup>+</sup> T cells are exhausted in CT26 tumour-*  
193 *bearing mice*

194 Recent studies using mouse models have shown that many tumour infiltrating anti-  
195 tumour CD8<sup>+</sup> T cells have an exhausted phenotype, characterised by PD-1 expression  
196 and a failure to express cytokines IL-2, TNF- $\alpha$  and IFN- $\gamma$  (20, 21). Little is known  
197 about whether, or to what extent, development of this phenotype relates to T cell  
198 specificity. Clearly, a relationship exists inasmuch as T cell activation via TcR is a  
199 prerequisite for the induction of exhaustion (reviewed in (22)). Given our previous  
200 observations of differential suppression of anti-CT26 responses with different  
201 specificity (17), we sought to investigate the induction of exhaustion in both AH1 and  
202 GSW11-specific CD8<sup>+</sup> T cells in CT26 tumour bearing mice using antigen-specific  
203 tetramers as specificity probes for T cell populations, independent of their functional  
204 phenotype. Due to the poor binding affinity of GSW11 for H2-D<sup>d</sup> (17) we utilised  
205 single chain trimer tetramers with GSW11 tethered to the binding groove using a  
206 short linker polypeptide (19), allowing stable expression of GSW11-D<sup>d</sup> monomers. In  
207 CT26 challenged Treg replete mice, GSW11-specific T cells were the most abundant  
208 CD8<sup>+</sup> T cell population in tumours, making up >50% of all CD8<sup>+</sup> T cell infiltration  
209 after 14 days of tumour challenge (Figure 1A, B, C). However, similar to the situation  
210 seen in many human cancers, these infiltrating CD8<sup>+</sup> T cells do not confer protection,  
211 and tumours continue to grow in these animals. The population of GSW11-specific T  
212 cells was significantly larger than AH1-specific T cells, which constituted a maximum  
213 of 20% of infiltrating T cells at later stages of tumour challenge (d17 and d22; Figure  
214 1B, C). Notably, while the two T cell populations (anti-GSW11 and -AH1 CD8<sup>+</sup> T  
215 cells) made up the majority of tumour infiltrating CD8<sup>+</sup> T cells (>60%) at later time

216 points (d14-22), they were in the minority in early anti-tumour responses (d7-10,  
217 Figure 1C). Thus, an initial broad-specificity polyclonal TIL response becomes  
218 focussed on two *gp90* derived epitopes during tumour growth (Figure 1C). We next  
219 investigated the function, after *ex vivo* peptide stimulation, of GSW11- and -AH1  
220 specific CD8<sup>+</sup> T cells harvested from tumours during the course of the challenge. The  
221 vast majority of GSW11-specific CD8<sup>+</sup> T cells were unable to produce IFN- $\gamma$ , with a  
222 decrease in functional T cells as the tumour progressed (Figure 1D, E). Most of the  
223 AH1-specific T cells were also non-functional, although, consistent with earlier  
224 studies showing their presence in tdLN and spleen (17), there were significantly more  
225 functional AH1-specific T cells at d22 compared to GSW11 (around 6% compared to  
226 <1% functional; Figure 1D, E). This minor population of functional tumour-specific T  
227 cells were, however, unable to control tumour growth.

228 To investigate whether the lack of effector function in anti-tumour T cells correlated  
229 with the expression of checkpoint molecules commonly associated with T cell  
230 dysfunction in tumours, we assessed the expression of PD-1 on GSW11- and AH1-  
231 specific T cells following tumour challenge. The majority of non-functional (IFN- $\gamma$ <sup>-</sup>)  
232 tumour infiltrating T cells of both specificities expressed PD-1 indicating the  
233 induction of an exhausted phenotype (50-80%; Figure 2A, B). Anti-GSW11 CD8<sup>+</sup>T  
234 cells acquired the non-functional phenotype more rapidly and to a greater extent  
235 compared to AH1-specific T cells. Thus, a greater proportion of GSW11-T cells were  
236 PD-1<sup>+</sup> IFN- $\gamma$ <sup>-</sup> at the first time-point, d7 ( $p = <0.001$ ), which was sustained throughout  
237 tumour growth (Figure 2B). Interestingly, a proportion of the small number of  
238 functional (IFN- $\gamma$ <sup>+</sup>) GSW11- and AH1-specific T cells also expressed PD-1, ranging  
239 from ~10% for AH1-specific T cells at day 7 to ~80% of GSW11-specific T cells at  
240 day 22 (Figure 2C), indicating that these T cells are both activated and functional.

241 These results indicate that tumour infiltrating GSW11-specific T cells are highly  
242 susceptible to the induction of an exhausted phenotype.

243

244 *The presence of regulatory T cells correlates with PD-1 expression on tumour*  
245 *infiltrating lymphocytes.*

246 The tumour microenvironment has been shown to play a crucial role in modulating  
247 anti-tumour T cell responses *in vivo* (23, 24) with the presence of tumour-infiltrating  
248 Tregs impacting negatively on tumour rejection (11). We therefore investigated the  
249 effect of Treg on the induction of exhaustion in infiltrating CD8<sup>+</sup> T cells. In a  
250 temporal analysis of TIL, Tregs comprised around 15% of total CD4<sup>+</sup> T cells at the  
251 earliest time point examined (d7). This rose to ~25% by d10 where it remained for the  
252 duration of the tumour challenge (Figure 3A). Interestingly, the accumulation of  
253 Tregs in the tumour followed similar kinetics to that observed for the loss of effector  
254 function in GSW11-specific T cells (Figure 2B and 1D). Most Tregs expressed PD-L1  
255 in both tumour and the tumour draining LN (tdLN) from the earliest time-point  
256 onwards (Figure 3B), suggesting that Treg suppression of GSW11-specific T cells  
257 may be mediated via PD-1/PD-L1 interaction. Since tumour-specific T cells also  
258 engage with tumour cells for activation, we examined the expression of PD-L1 on  
259 tumour cells over 25 days following inoculation. *In vitro* CT26 expressed low levels  
260 of PD-L1, however this increased significantly both in terms of the proportion of  
261 CT26 expressing, and the level of expression following their seeding and growth *in*  
262 *vivo* (Figure 3C). These results suggest that during initial stages of growth, the tumour  
263 provides a pro-inflammatory microenvironment, characterised by IFN- $\gamma$  producing T  
264 cells (and perhaps iNKT/NK cells). This rapidly changes to an immunosuppressive  
265 microenvironment in both the tumour and tdLN, characterised by upregulation of

266 inhibitory ligands by the tumour, infiltration of Treg, and upregulation of PD1 on  
267 infiltrating tumour-specific CD8+ T cells accompanied by their loss of effector  
268 function.

269

270 *Dysfunction of anti-tumour T cells is induced in the periphery*

271 We next investigated whether GSW11- and AH1-specific T cells are primed  
272 effectively to induce T cell effectors. Examination of naïve T cell populations  
273 (GSW11 and AH1) showed that both expressed low levels of PD-1 (consistent with  
274 previous studies; (25)) with expression on GSW11-specific T cells being slightly  
275 greater than AH1-specific T cells (Figure 4A). Following CT26 seeding in Treg  
276 replete mice we observed functional (IFN- $\gamma$  producing) AH1- and GSW11-specific T  
277 cells in spleen and tdLN, appearing at d3 and detectable through to the humane end  
278 point at d22, with AH1-specific T cells dominating over GSW11-specific T cells at  
279 later time points (Figure 4B and C). AH1-specific responses were similar throughout  
280 the experiment in lymphoid organs, with the greatest response in spleen (Figure 4C).  
281 By contrast, GSW11-specific IFN- $\gamma$  responses were greatest at early time points (d3-  
282 10) and declined over time (Figure 4B). This confirmed that a co-dominant, functional  
283 (IFN- $\gamma$ ) response to AH1 and GSW11 was established in tdLN and spleen  
284 immediately following tumour seeding in Treg replete mice and that over time,  
285 progressive loss of functional anti-GSW11, but not anti-AH1-specific T cells, was  
286 seen. In Treg depleted mice, in which tumours are rejected, GSW11-specific T cells  
287 were dominant at most time points, in particular at time points d3-17, in both spleen  
288 and tdLN with the greatest response observed in spleen (in line with our previous  
289 observations (17) and Figure 4B and C). In addition, the magnitude of anti-GSW11  
290 responses were much greater in Treg depleted compared to Treg-replete mice. AH1-

291 specific responses became co-dominant after d17. Indeed, the magnitude of the anti-  
292 AH1 response was not sensitive to the presence or absence of Treg (Figure 4C).  
293 Analysis of PD-1 expression on non-functional (IFN- $\gamma$ <sup>-</sup>) T cells revealed that a  
294 significant proportion (~20%) of GSW11-specific T cells in the spleen and tdLN  
295 expressed PD-1 throughout the time-course, even at the earliest time-point of 3 days;  
296 rising to ~40% at d22 in tdLN (Figure 4D). By contrast, only a very small proportion  
297 of IFN- $\gamma$ <sup>-</sup> AH1-specific T cells expressed PD-1, with a maximum of ~10% of cells in  
298 tdLN reached by d22 (Figure 4E). A similar pattern of dysfunctional GSW11- and  
299 AH1-specific T cells was observed in the spleens of tumour challenged Treg depleted  
300 mice, although, there was a much greater reduction in GSW11-specific T cells  
301 compared to AH1, illustrating the differential suppression of anti-CT26 T cells by  
302 Tregs ((17) and Figure 4D and E). Importantly, the proportion of dysfunctional  
303 GSW11-specific T cells was significantly lower in tdLN of Treg depleted mice (d7  
304 and d22; Figure 4D), suggesting that Treg can exert their effect on T cells in tdLN and  
305 spleen and their removal reduces the induction of dysfunction in tumour-specific T  
306 cells following priming.

307 It is likely that the precursors of IFN- $\gamma$ <sup>-</sup>, PD-1<sup>+</sup> T cells are IFN- $\gamma$ <sup>+</sup>, PD-1<sup>+</sup> (22),  
308 therefore, to gain a better understanding of the dynamics of transition from functional  
309 to dysfunctional phenotypes we assessed PD-1 expression on functional (IFN- $\gamma$ <sup>+</sup>)  
310 CD8<sup>+</sup> T cells. In Treg replete mice, levels of PD-1<sup>+</sup> IFN- $\gamma$ <sup>+</sup> GSW11- and AH1-  
311 specific T cells were similar, although more AH1-specific T cells were observed at  
312 later time points in spleens (d14-22; Figure 4F and G). Similar levels of PD-1<sup>+</sup> IFN- $\gamma$ <sup>+</sup>  
313 GSW11- and AH1-specific T cells were observed in Treg depleted mice, however  
314 more PD-1<sup>+</sup> IFN- $\gamma$ <sup>+</sup> GSW11-specific T cells were seen at d17 and d22 in spleens  
315 (Figure 4F and G). These results indicate that, although the level of primed functional

316 AH1- and GSW11-specific responses is similar, GSW11-specific T cells are more  
317 susceptible to the induction of a dysfunctional phenotype.

318

319 *Diversity of GSW11-specific T cell responses in Treg depleted mice*

320 Previous studies have shown that the presence of Treg during priming to a  
321 transplantation antigen inhibits the priming of T cells with low-avidity TcR (26). To  
322 investigate this possibility in the context of Treg-dependent tumour rejection, we first  
323 investigated the oligoclonality of the anti-GSW11 T cell response with a view to  
324 identifying oligoclonal populations that are preferentially suppressed by Treg. To this  
325 end, we determined TcR V $\beta$  usage of GSW11-specific T cells from CT26 challenged  
326 Treg replete mice using a panel of V-region specific antibodies. This revealed that the  
327 anti-GSW11 response was very diverse with at least 15 different clonotypes observed  
328 (Figure 5A and B). Despite the broad response only three V $\beta$  represented >10% of  
329 GSW11-specific T cells (V $\beta$ 8.1/8.2, V $\beta$ 8.3 and V $\beta$ 14; Figure 5A) indicating a  
330 predominantly oligoclonal response despite the broad V $\beta$  usage. In Treg depleted  
331 mice the anti-GSW11 response was similarly broad, although some populations were  
332 significantly increased, such as those expressing V $\beta$ 3 and V $\beta$ 13 and others  
333 diminished, such as V $\beta$ 10b and V $\beta$ 14 compared to Treg replete responses (Figure 5A,  
334 B). Intriguingly, some responses such as V $\beta$ 8.1/8.2 and V $\beta$ 8.3 (which make up ~30%  
335 and ~12% of the response respectively) were largely unchanged following Treg  
336 depletion. These findings suggest that Tregs modulate the anti-tumour GSW11-  
337 specific response by preferentially suppressing some T cell clones leading to the  
338 expansion of others.

339

340 *Tregs target lower avidity anti-GSW11 T cells*

341 We next estimated the TcR avidity of anti-GSW11 T cell oligoclonal populations that were  
342 preferentially suppressed by Treg (V $\beta$ 3 and V $\beta$ 13) compared to oligoclonal populations that were  
343 largely unaffected by the presence of Treg (V $\beta$ 8.1/8.2 and V $\beta$ 8.3), using tetramer  
344 competition assays as described previously (Figure 6A and (27)). The two dominant T  
345 cell oligoclonal populations that expanded following Treg depletion, V $\beta$ 3 and V $\beta$ 13, had a lower  
346 avidity compared to V $\beta$ 8.1/8.2 and V $\beta$ 8.3 T cells, which had similar populations  
347 whether Tregs were present or not (Figure 6B and C). In addition, two oligoclonal populations,  
348 V $\beta$ 10b and V $\beta$ 14, which were proportionally better represented in Treg replete mice,  
349 displayed a high avidity similar to that observed for V $\beta$ 8.1/8.2 and V $\beta$ 8.3 T cells  
350 (Figure 6B and C). Levels of cell surface TcR  $\beta$  chain were similar regardless of the  
351 amount of competing tetramer added (Supplementary figure 1). This confirmed that  
352 the reduction in tetramer staining was due to competition and not decreased TcR. In  
353 pooled samples from groups of 3/4 mice, these low avidity T cells account for ~16%  
354 of the total anti-GSW11 response in Treg depleted animals compared to ~2.5% in  
355 Treg replete animals (red shades; Figure 5B). In addition, high avidity T cells make  
356 up >70% and ~55% of the total anti-GSW11 T cell response in Treg replete and  
357 depleted mice respectively (blue shades; Figure 5B). This indicates that sensitivity of  
358 a T cell to Treg suppression might be linked to TcR avidity, with lower avidity T cells  
359 preferentially targeted. Therefore, in the CT26 model, Treg depletion results in the  
360 elaboration of a tumoricidal GSW11-specific T cell response, which appears to  
361 correlate with preferential expansion of some low avidity GSW11-specific sub-clones.  
362 The response in Treg depleted mice represents a 6-fold increase in low avidity TcR,  
363 which make up ~1/6 of the GSW11-specific response compared to only 1/40 in Treg  
364 replete mice.

365



366 **Discussion**

367 Immune surveillance of cancers starts with the priming of T cells to tumour associated  
368 antigens (TAA) and their infiltration into the diseased tissue. Here, their anti-tumour  
369 function is modulated by the evolving microenvironment, often leading to tumour  
370 escape via multiple mechanisms including the induction of T cell tolerance/anergy  
371 (through lack of co-stimulation during priming) or exhaustion (through the  
372 progressive loss of effector function following activation) (22, 28). Using antigen-  
373 specific multimers, we show that, in a commercially important preclinical mouse  
374 model, growing CT26 tumours are highly infiltrated with tumour-specific CTL  
375 recognising one of two non-mutated epitopes (GSW11 and AH1) from a single highly  
376 abundant TAA, *gp90*. Most TIL, however, exhibit an exhausted phenotype, which is  
377 at least in part mediated by Tregs.

378 In human cancer, high levels of T cell infiltration generally correlate with good  
379 prognosis. This infiltration is marked by a signature that includes increased  
380 transcription of genes associated with antigen processing and presentation (MHC I  
381 and MHC II), T cell markers (CD8, CD4, CD3) and genes associated with T cell  
382 homing (*CCL2*, *CCL3*, *CCL4*, *CXCL9*, *CXCL10* – the latter two being CD8+T-cell  
383 specific), signalling (ICOS, IRF1) and CTL function (granzymes, IFN- $\gamma$ ) (29, 30).  
384 These are all consistent with the tumour milieu supporting ongoing peptide:MHC I  
385 (pMHC I)-driven T cell proliferation via TcR engagement. However, because of their  
386 secretion of the inflammatory cytokine IFN- $\gamma$ , CD8+ TIL also drive evolution of the  
387 immunosuppressive microenvironment including expression of PD-L1, IDO and the  
388 infiltration of Tregs (31). In addition, T cells derived from highly infiltrated tumours  
389 express the highest levels of inhibitory receptors (such as PD-1) (31). Immunotherapy  
390 targets all three key stages of anti-tumour immunity: priming, infiltration and

391 regulation, and the gene signature for T cell inflamed (so-called ‘hot’) tumours  
392 encompasses patterns of differentially expressed transcripts associated with positive  
393 responses to checkpoint blockade immunotherapy (PD-1, PD-L1, CTLA4) (32).

394 The CT26 tumour microenvironment resembles cancers with a strong T cell  
395 inflamed phenotype, and a signature that includes elevated transcripts for T cell  
396 infiltration and activation, CD8, CD4, CD3, CD45, CD62L, CD80, CD86, CD40,  
397 OX40L, CD25 and immunosuppression including FoxP3, CTLA-4 and IDO (32).

398 Indeed, we show here that although the tumour mass is infiltrated with tumour-  
399 specific CD8+ T cells, they are functionally inert. Despite the obvious differences  
400 between spontaneously arising cancer and a transplantable mouse model, studies that  
401 have directly compared spontaneous and transplantable tumour models in mice have  
402 found only small differences in the tumour-host interaction including immune gene  
403 profiles (32, 33). Thus, our time-course of CT26 growth might reasonably  
404 approximate to a model for the evolution of the tumour-immune interaction in  
405 spontaneously arising cancers in terms of immune-editing and the development of  
406 host immune modulation mechanisms within the microenvironment. This is  
407 encouraging because transplantable models are more experimentally tractable and  
408 permit a more rapid turnaround of preclinical immunotherapy studies.

409 With this in mind, we observed two key features of the CT26:BALB/c  
410 interaction that are relevant to understanding human disease and its response to  
411 immunotherapy. Firstly, Treg can differentially suppress different CTL clones  
412 recognising TAA and this even applies to CTL recognising the same pMHC I  
413 complex; and secondly that differential suppression of GSW11 and AH1-specific T  
414 cells, characterised by upregulation of PD-1 expression and loss of effector function  
415 (IFN- $\gamma$  production) was observed very early after tumour challenge (d3) in tdLN. This

416 indicated that a large proportion of GSW11-specific CD8+ T cells were dysfunctional  
417 at the site of priming.

418         The early preferential suppression of anti-GSW11 T cells persists in peripheral  
419 tissues where a disparity between dysfunctional GSW11- and AH1-specific T cells is  
420 evident in tdLN and spleen. By contrast, in tumours, the difference between GSW11  
421 and AH1 T cells diminishes after d10. This difference between tdLN and tumour  
422 indicates that there may be separate mechanisms that operate to establish T cell  
423 dysfunction at the early priming and late effector phase. The differential induction of  
424 dysfunction in GSW11 at early time points in tdLN, which is significantly reduced in  
425 the absence of Tregs, suggests that Tregs play a key role in this process. The rapid  
426 expression of PD-L1 on Tregs and PD-1 expression on GSW11-specific T cells  
427 indicates this may be an important interaction. Indeed, stimulation of PD-1 (rapidly  
428 upregulated following activation) by PD-L1 expressed on antigen presentation cells  
429 can cause T cell anergy, defined by reduced proliferative capacity, in a peptide  
430 induced model (34). The difference observed in PD-1 expression between AH1- and  
431 GSW11-T cells may therefore be a reflection of the relative susceptibility to Treg  
432 suppression at the priming stage mediated by PD-1/PD-L1 interaction. Once at the  
433 tumour, there is much less difference between AH1 and GSW11 with respect to a  
434 dysfunctional 'exhausted' phenotype. This change may be due to the increased  
435 expression of PD-1 on AH1-T cells, similar to that observed on GSW11-T cells at the  
436 tumour, due to continued antigenic stimulation (22). In addition, the more suppressive  
437 microenvironment at the tumour site with PD-L1 expression on tumour cells as well  
438 as Tregs, which accumulate over time, and the presence of immunosuppressive  
439 cytokines such as TGF- $\beta$ , may overcome any ability of AH1-specific T cells (and to a  
440 lesser degree GSW11-T cells) to resist the induction of exhaustion.

441           The presence of Tregs in several cancer types is a negative prognostic  
442 indicator. In addition, tumour-infiltrating Tregs have been shown to express gene  
443 signatures, including markers of activation and function, which distinguish them from  
444 not only blood Tregs, but also tissue resident Tregs from healthy tissue of the same  
445 origin (35, 36). Clinical trials are underway to determine the outcome of agents  
446 designed to reduce Treg numbers by targeting the IL-2 receptor or GITR. To date  
447 these results have been varied, with daclizumab (anti-CD25) reducing Treg numbers  
448 in patients while allowing the induction of T cell responses to targeted tumour  
449 antigens (37, 38) and a phase 1 trial of an anti-GITR antibody (TRX518) decreasing  
450 Treg numbers in the tumour and circulating blood (39). However, depletion of Tregs  
451 in stage IV melanoma with an IL-2/diphtheria toxin conjugate (DAB/IL-2) showed  
452 partial responses in only 16.7% of patients, although there was a greater one year  
453 survival in partial responders compared to those with progressive disease (80% vs.  
454 23.7%; (40)). This study provides a fuller mechanistic framework for the further  
455 rational development of Treg-targeted immunotherapy. Treg suppression of GSW11-  
456 specific T cells primarily affected those with lower avidity TcR. These clones  
457 expanded in the absence of Tregs, and correlated with survival, suggesting they are  
458 important in tumour rejection. It will be interesting to know whether these expanded  
459 CTL have a similar profile to the recently described CD103<sup>+</sup> CD8<sup>+</sup>T<sub>RM</sub> that  
460 characterise T cell infiltrates of NSCLC associated with prolonged survival (41). The  
461 expansion of protective low Ka T cell clones in Treg depleted mice is consistent with  
462 previous studies. For example, Pace et al showed that the presence of Treg during  
463 priming to a transplantation antigen increased the affinity of the CD8<sup>+</sup> T cell response  
464 by inhibiting the priming of T cells bearing low affinity TcR via a mechanism

465 involving CCL3/4 dependent destabilisation of T cell interactions with dendritic cells  
466 (26).

467 The therapeutic efficacy of the low-avidity T cell clones was somewhat  
468 unexpected since it is generally assumed that high avidity T cells have a competitive  
469 advantage in an immune response due to stronger and prolonged activation signals  
470 (42, 43). However, in a situation of persistent antigenic stimulation, as is encountered  
471 in the tumour, it is likely that these T cells progress to exhaustion as observed in  
472 chronic viral infection. Low avidity CTL may escape the same fate through lower  
473 expression of PD-1 or by receiving a TcR signal below the threshold required for  
474 exhaustion while maintaining some effector function (44, 45).

475 The identification of low  $K_a$  GSW11-specific TcR, which correlate with  
476 protection, may have implications for epitope selection in immunotherapy. Current  
477 strategies concentrate on the identification and use of tumour epitopes with a high  
478  $K_a$ /slow off-rate in an attempt to induce CD8<sup>+</sup> T cell responses with a strong  $K_a$  TcR  
479 (46-48). This approach has had some success with antigen-specific T cell responses  
480 directed to TAA such as NY-ESO-1 and MART-1 and neoantigens. However, only a  
481 small proportion of these patients show a partial or complete clinical response (49,  
482 50). These studies show that, while the induction of high-avidity T cells to dominant  
483 TAA occur, in a therapeutic setting, it may be more efficacious to induce a broad  
484 repertoire of TcR affinities using peptide epitopes presented at sufficient levels  
485 regardless of their affinity for MHC. With this in mind, it is notable that the dominant  
486 target peptide recognised by TIL in CT26, GSW11, binds weakly to its presenting  
487 MHC I, H2-D<sup>d</sup> with a half-life of ~20min at the cell surface, though it is presented in  
488 high abundance (17). It will therefore be important to understand the relationship  
489 between antigen processing/presentation and the induction of low avidity T cells. For

490 example, algorithms predicting the affinity of candidate peptides could be better  
491 deployed for selecting candidate epitopes for targeted immunotherapy if used in  
492 combination with computational models that take into account antigen abundance and  
493 mechanistic details of the antigen processing pathway.

494 **Acknowledgements**

495 We thank Leon Douglas and Patrick Duriez from the Cancer Research UK ECMC  
496 Protein Core Facility for help and advice with tetramer production and Nasia Kontouli  
497 for the purification of the PC61 antibodies.  
498

499 **References:**

- 500 1. Hiraoka, K., M. Miyamoto, Y. Cho, M. Suzuoki, T. Oshikiri, Y. Nakakubo, T.  
501 Itoh, T. Ohbuchi, S. Kondo, and H. Katoh. 2006. Concurrent infiltration by  
502 CD8+ T cells and CD4+ T cells is a favourable prognostic factor in non-small-  
503 cell lung carcinoma. *Br J Cancer* 94: 275-280.
- 504 2. Naito, Y., K. Saito, K. Shiiba, A. Ohuchi, K. Saigenji, H. Nagura, and H.  
505 Ohtani. 1998. CD8+ T cells infiltrated within cancer cell nests as a prognostic  
506 factor in human colorectal cancer. *Cancer Res* 58: 3491-3494.
- 507 3. Nakano, O., M. Sato, Y. Naito, K. Suzuki, S. Orikasa, M. Aizawa, Y. Suzuki,  
508 I. Shintaku, H. Nagura, and H. Ohtani. 2001. Proliferative activity of  
509 intratumoral CD8(+) T-lymphocytes as a prognostic factor in human renal cell  
510 carcinoma: clinicopathologic demonstration of antitumor immunity. *Cancer*  
511 *Res* 61: 5132-5136.
- 512 4. Pages, F., A. Berger, M. Camus, F. Sanchez-Cabo, A. Costes, R. Molitor, B.  
513 Mlecnik, A. Kirilovsky, M. Nilsson, D. Damotte, T. Meatchi, P. Bruneval, P.  
514 H. Cugnenc, Z. Trajanoski, W. H. Fridman, and J. Galon. 2005. Effector  
515 memory T cells, early metastasis, and survival in colorectal cancer. *N Engl J*  
516 *Med* 353: 2654-2666.
- 517 5. Sato, E., S. H. Olson, J. Ahn, B. Bundy, H. Nishikawa, F. Qian, A. A.  
518 Jungbluth, D. Frosina, S. Gnjjatic, C. Ambrosone, J. Kepner, T. Odunsi, G.  
519 Ritter, S. Lele, Y. T. Chen, H. Ohtani, L. J. Old, and K. Odunsi. 2005.  
520 Intraepithelial CD8+ tumor-infiltrating lymphocytes and a high  
521 CD8+/regulatory T cell ratio are associated with favorable prognosis in  
522 ovarian cancer. *Proc Natl Acad Sci U S A* 102: 18538-18543.
- 523 6. Shankaran, V., H. Ikeda, A. T. Bruce, J. M. White, P. E. Swanson, L. J. Old,  
524 and R. D. Schreiber. 2001. IFN $\gamma$  and lymphocytes prevent primary  
525 tumour development and shape tumour immunogenicity. *Nature* 410: 1107-  
526 1111.
- 527 7. Smyth, M. J., K. Y. Thia, S. E. Street, D. MacGregor, D. I. Godfrey, and J. A.  
528 Trapani. 2000. Perforin-mediated cytotoxicity is critical for surveillance of  
529 spontaneous lymphoma. *J Exp Med* 192: 755-760.
- 530 8. Dunn, G. P., A. T. Bruce, H. Ikeda, L. J. Old, and R. D. Schreiber. 2002.  
531 Cancer immunoediting: from immunosurveillance to tumor escape. *Nat*  
532 *Immunol* 3: 991-998.
- 533 9. Schreiber, R. D., L. J. Old, and M. J. Smyth. 2011. Cancer immunoediting:  
534 integrating immunity's roles in cancer suppression and promotion. *Science*  
535 331: 1565-1570.
- 536 10. Dempke, W. C. M., K. Fenchel, P. Uciechowski, and S. P. Dale. 2017.  
537 Second- and third-generation drugs for immuno-oncology treatment—The  
538 more the better? *European Journal of Cancer* 74: 55-72.
- 539 11. Shang, B., Y. Liu, S. J. Jiang, and Y. Liu. 2015. Prognostic value of tumor-  
540 infiltrating FoxP3+ regulatory T cells in cancers: a systematic review and  
541 meta-analysis. *Sci Rep* 5: 15179.
- 542 12. Olson, B. M., and D. G. McNeel. 2013. Monitoring regulatory immune  
543 responses in tumor immunotherapy clinical trials. *Front Oncol* 3: 109.
- 544 13. Golgher, D., E. Jones, F. Powrie, T. Elliott, and A. Gallimore. 2002. Depletion  
545 of CD25+ regulatory cells uncovers immune responses to shared murine  
546 tumor rejection antigens. *Eur J Immunol* 32: 3267-3275.



- 547 14. Onizuka, S., I. Tawara, J. Shimizu, S. Sakaguchi, T. Fujita, and E. Nakayama.  
548 1999. Tumor Rejection by *in Vivo* Administration of Anti-CD25  
549 (Interleukin-2 Receptor  $\alpha$ ) Monoclonal Antibody. *Cancer Research* 59: 3128-  
550 3133.
- 551 15. Grosso, J. F., and M. N. Jure-Kunkel. 2013. CTLA-4 blockade in tumor  
552 models: an overview of preclinical and translational research. *Cancer Immun*  
553 13: 5.
- 554 16. Stewart, R., M. Morrow, S. A. Hammond, K. Mulgrew, D. Marcus, E. Poon,  
555 A. Watkins, S. Mullins, M. Chodorge, J. Andrews, D. Bannister, E. Dick, N.  
556 Crawford, J. Parmentier, M. Alimzhanov, J. S. Babcook, I. N. Foltz, A.  
557 Buchanan, V. Bedian, R. W. Wilkinson, and M. McCourt. 2015. Identification  
558 and Characterization of MEDI4736, an Antagonistic Anti-PD-L1 Monoclonal  
559 Antibody. *Cancer Immunol Res* 3: 1052-1062.
- 560 17. James, E., A. Yeh, C. King, F. Korangy, I. Bailey, D. S. Boulanger, B. J. Van  
561 den Eynde, N. Murray, and T. J. Elliott. 2010. Differential suppression of  
562 tumor-specific CD8<sup>+</sup> T cells by regulatory T cells. *J Immunol* 185: 5048-  
563 5055.
- 564 18. Huang, A. Y., P. H. Gulden, A. S. Woods, M. C. Thomas, C. D. Tong, W.  
565 Wang, V. H. Engelhard, G. Pasternack, R. Cotter, D. Hunt, D. M. Pardoll, and  
566 E. M. Jaffee. 1996. The immunodominant major histocompatibility complex  
567 class I-restricted antigen of a murine colon tumor derives from an endogenous  
568 retroviral gene product. *Proc Natl Acad Sci U S A* 93: 9730-9735.
- 569 19. Truscott, S. M., L. Lybarger, J. M. Martinko, V. E. Mitaksov, D. M. Kranz, J.  
570 M. Connolly, D. H. Fremont, and T. H. Hansen. 2007. Disulfide bond  
571 engineering to trap peptides in the MHC class I binding groove. *J Immunol*  
572 178: 6280-6289.
- 573 20. Duraiswamy, J., G. J. Freeman, and G. Coukos. 2013. Therapeutic PD-1  
574 pathway blockade augments with other modalities of immunotherapy T-cell  
575 function to prevent immune decline in ovarian cancer. *Cancer Res* 73: 6900-  
576 6912.
- 577 21. Sakuishi, K., L. Apetoh, J. M. Sullivan, B. R. Blazar, V. K. Kuchroo, and A.  
578 C. Anderson. 2010. Targeting Tim-3 and PD-1 pathways to reverse T cell  
579 exhaustion and restore anti-tumor immunity. *J Exp Med* 207: 2187-2194.
- 580 22. Wherry, E. J., and M. Kurachi. 2015. Molecular and cellular insights into T  
581 cell exhaustion. *Nat Rev Immunol* 15: 486-499.
- 582 23. Gajewski, T. F., H. Schreiber, and Y. X. Fu. 2013. Innate and adaptive  
583 immune cells in the tumor microenvironment. *Nat Immunol* 14: 1014-1022.
- 584 24. Marvel, D., and D. I. Gabrilovich. 2015. Myeloid-derived suppressor cells in  
585 the tumor microenvironment: expect the unexpected. *J Clin Invest* 125: 3356-  
586 3364.
- 587 25. Agata, Y., A. Kawasaki, H. Nishimura, Y. Ishida, T. Tsubata, H. Yagita, and  
588 T. Honjo. 1996. Expression of the PD-1 antigen on the surface of stimulated  
589 mouse T and B lymphocytes. *Int Immunol* 8: 765-772.
- 590 26. Pace, L., A. Tempez, C. Arnold-Schrauf, F. Lemaitre, P. Bousso, L. Fetler, T.  
591 Sparwasser, and S. Amigorena. 2012. Regulatory T cells increase the avidity  
592 of primary CD8<sup>+</sup> T cell responses and promote memory. *Science* 338: 532-  
593 536.
- 594 27. Holmberg, K., S. Mariathasan, T. Ohteki, P. S. Ohashi, and N. R. Gascoigne.  
595 2003. TCR binding kinetics measured with MHC class I tetramers reveal a

- 596 positive selecting peptide with relatively high affinity for TCR. *J Immunol*  
597 171: 2427-2434.
- 598 28. Schietinger, A., and P. D. Greenberg. 2014. Tolerance and exhaustion:  
599 defining mechanisms of T cell dysfunction. *Trends Immunol* 35: 51-60.
- 600 29. Gajewski, T. F., J. Louahed, and V. G. Brichard. 2010. Gene signature in  
601 melanoma associated with clinical activity: a potential clue to unlock cancer  
602 immunotherapy. *Cancer J* 16: 399-403.
- 603 30. Spranger, S., J. J. Luke, R. Bao, Y. Zha, K. M. Hernandez, Y. Li, A. P.  
604 Gajewski, J. Andrade, and T. F. Gajewski. 2016. Density of immunogenic  
605 antigens does not explain the presence or absence of the T-cell-inflamed tumor  
606 microenvironment in melanoma. *Proc Natl Acad Sci U S A* 113: E7759-  
607 E7768.
- 608 31. Spranger, S., R. M. Spaapen, Y. Zha, J. Williams, Y. Meng, T. T. Ha, and T.  
609 F. Gajewski. 2013. Up-regulation of PD-L1, IDO, and T(regs) in the  
610 melanoma tumor microenvironment is driven by CD8(+) T cells. *Sci Transl*  
611 *Med* 5: 200ra116.
- 612 32. Lechner, M. G., S. S. Karimi, K. Barry-Holson, T. E. Angell, K. A. Murphy,  
613 C. H. Church, J. R. Ohlfest, P. Hu, and A. L. Epstein. 2013. Immunogenicity  
614 of murine solid tumor models as a defining feature of in vivo behavior and  
615 response to immunotherapy. *J Immunother* 36: 477-489.
- 616 33. Murphy, K. A., M. G. Lechner, F. E. Popescu, J. Bedi, S. A. Decker, P. Hu, J.  
617 R. Erickson, M. G. O'Sullivan, L. Swier, A. M. Salazar, M. R. Olin, A. L.  
618 Epstein, and J. R. Ohlfest. 2012. An in vivo immunotherapy screen of  
619 costimulatory molecules identifies Fc-OX40L as a potent reagent for the  
620 treatment of established murine gliomas. *Clin Cancer Res* 18: 4657-4668.
- 621 34. Chikuma, S., S. Terawaki, T. Hayashi, R. Nabeshima, T. Yoshida, S.  
622 Shibayama, T. Okazaki, and T. Honjo. 2009. PD-1-mediated suppression of  
623 IL-2 production induces CD8+ T cell anergy in vivo. *J Immunol* 182: 6682-  
624 6689.
- 625 35. De Simone, M., A. Arrigoni, G. Rossetti, P. Gruarin, V. Ranzani, C. Politano,  
626 R. J. Bonnal, E. Provasi, M. L. Sarnicola, I. Panzeri, M. Moro, M. Crosti, S.  
627 Mazzara, V. Vaira, S. Bosari, A. Palleschi, L. Santambrogio, G. Bovo, N.  
628 Zucchini, M. Totis, L. Gianotti, G. Cesana, R. A. Perego, N. Maroni, A. Pisani  
629 Ceretti, E. Opocher, R. De Francesco, J. Geginat, H. G. Stunnenberg, S.  
630 Abrignani, and M. Pagani. 2016. Transcriptional Landscape of Human Tissue  
631 Lymphocytes Unveils Uniqueness of Tumor-Infiltrating T Regulatory Cells.  
632 *Immunity* 45: 1135-1147.
- 633 36. Plitas, G., C. Konopacki, K. Wu, P. D. Bos, M. Morrow, E. V. Putintseva, D.  
634 M. Chudakov, and A. Y. Rudensky. 2016. Regulatory T Cells Exhibit Distinct  
635 Features in Human Breast Cancer. *Immunity* 45: 1122-1134.
- 636 37. Rech, A. J., and R. H. Vonderheide. 2009. Clinical use of anti-CD25 antibody  
637 daclizumab to enhance immune responses to tumor antigen vaccination by  
638 targeting regulatory T cells. *Ann N Y Acad Sci* 1174: 99-106.
- 639 38. Jacobs, J. F., C. J. Punt, W. J. Lesterhuis, R. P. Suttmuller, H. M. Brouwer, N.  
640 M. Scharenborg, I. S. Klasen, L. B. Hilbrands, C. G. Figdor, I. J. de Vries, and  
641 G. J. Adema. 2010. Dendritic cell vaccination in combination with anti-CD25  
642 monoclonal antibody treatment: a phase I/II study in metastatic melanoma  
643 patients. *Clin Cancer Res* 16: 5067-5078.
- 644 39. Zappasodi, R., Y. Li, M. Abu-Akeel, J. Qi, P. Wong, C. Sirard, M. Postow, D.  
645 A. Schaer, W. Newman, H. Koon, V. Velcheti, M. K. Callahan, J. D.

- 646 Wolchok, and T. Merghoub. 2017. Intratumor and peripheral Treg modulation  
647 as a pharmacodynamic biomarker of the GITR agonist antibody TRX-518 in  
648 the first in-human trial [abstract]. In: *Proceedings of the Annual Meeting of*  
649 *the American Association for Cancer Research; 2017 Apr 1-5; Washington,*  
650 *DC: AACR; 2017: Abstract nr CT018.*
- 651 40. Telang, S., M. A. Rasku, A. L. Clem, K. Carter, A. C. Klarer, W. R. Badger,  
652 R. A. Milam, S. N. Rai, J. Pan, H. Gragg, B. F. Clem, K. M. McMasters, D.  
653 M. Miller, and J. Chesney. 2011. Phase II trial of the regulatory T cell-  
654 depleting agent, denileukin diftitox, in patients with unresectable stage IV  
655 melanoma. *BMC Cancer* 11: 515.
- 656 41. Ganesan, A. P., J. Clarke, O. Wood, E. M. Garrido-Martin, S. J. Chee, T.  
657 Mellows, D. Samaniego-Castruita, D. Singh, G. Seumois, A. Alzetani, E.  
658 Woo, P. S. Friedmann, E. V. King, G. J. Thomas, T. Sanchez-Elsner, P.  
659 Vijayanand, and C. H. Ottensmeier. 2017. Tissue-resident memory features  
660 are linked to the magnitude of cytotoxic T cell responses in human lung  
661 cancer. *Nat Immunol* 18: 940-950.
- 662 42. Busch, D. H., and E. G. Pamer. 1999. T cell affinity maturation by selective  
663 expansion during infection. *J Exp Med* 189: 701-710.
- 664 43. Zehn, D., S. Y. Lee, and M. J. Bevan. 2009. Complete but curtailed T-cell  
665 response to very low-affinity antigen. *Nature* 458: 211-214.
- 666 44. Conrad, J. A., R. K. Ramalingam, R. M. Smith, L. Barnett, S. L. Lorey, J.  
667 Wei, B. C. Simons, S. Sadagopal, D. Meyer-Olson, and S. A. Kalams. 2011.  
668 Dominant clonotypes within HIV-specific T cell responses are programmed  
669 death-1high and CD127low and display reduced variant cross-reactivity. *J*  
670 *Immunol* 186: 6871-6885.
- 671 45. Harari, A., C. Cellera, F. Bellutti Enders, J. Kostler, L. Codarri, G. Tapia, O.  
672 Boyman, E. Castro, S. Gaudieri, I. James, M. John, R. Wagner, S. Mallal, and  
673 G. Pantaleo. 2007. Skewed association of polyfunctional antigen-specific CD8  
674 T cell populations with HLA-B genotype. *Proc Natl Acad Sci U S A* 104:  
675 16233-16238.
- 676 46. Castle, J. C., S. Kreiter, J. Diekmann, M. Löwer, N. van de Roemer, J. de  
677 Graaf, A. Selmi, M. Diken, S. Boegel, C. Paret, M. Koslowski, A. N. Kuhn, C.  
678 M. Britten, C. Huber, Ö. Türeci, and U. Sahin. 2012. Exploiting the  
679 Mutanome for Tumor Vaccination. *Cancer Research* 72: 1081-1091.
- 680 47. Robbins, P. F., Y.-C. Lu, M. El-Gamil, Y. F. Li, C. Gross, J. Gartner, J. C.  
681 Lin, J. K. Teer, P. Cliften, E. Tycksen, Y. Samuels, and S. A. Rosenberg.  
682 2013. Mining Exomic Sequencing Data to Identify Mutated Antigens  
683 Recognized by Adoptively Transferred Tumor-reactive T cells. *Nature*  
684 *medicine* 19: 747-752.
- 685 48. Rooij, N. v., M. M. v. Buuren, D. Philips, A. Velds, M. Toebes, B.  
686 Heemskerk, L. J. A. v. Dijk, S. Behjati, H. Hilkmann, D. e. Atmioui, M.  
687 Nieuwland, M. R. Stratton, R. M. Kerkhoven, C. Keşmir, J. B. Haanen, P.  
688 Kvistborg, and T. N. Schumacher. 2013. Tumor Exome Analysis Reveals  
689 Neoantigen-Specific T-Cell Reactivity in an Ipilimumab-Responsive  
690 Melanoma. *Journal of Clinical Oncology* 31: e439-e442.
- 691 49. Carreno, B. M., V. Magrini, M. Becker-Hapak, S. Kaabinejadian, J. Hundal,  
692 A. A. Petti, A. Ly, W. R. Lie, W. H. Hildebrand, E. R. Mardis, and G. P.  
693 Linette. 2015. Cancer immunotherapy. A dendritic cell vaccine increases the  
694 breadth and diversity of melanoma neoantigen-specific T cells. *Science* 348:  
695 803-808.

- 696 50. Rosenberg, S. A., J. C. Yang, and N. P. Restifo. 2004. Cancer immunotherapy:  
697 moving beyond current vaccines. *Nat Med* 10: 909-915.  
698
- 699

700 **Figure Legends**

701 **Figure 1. The majority of tumour infiltrating GSW11-specific T cells are non-**  
702 **functional.** Balb/c mice were challenged with CT26 tumour cells and the presence of  
703 tumour infiltrating AH1- and GSW11-specific T cells was assessed over the indicated  
704 time course. (A) Assessment of AH1- and GSW11-specific T cells using  
705 tetramer/dextramer and IFN- $\gamma$  production at d10 and d22. (B) Percentage of antigen-  
706 specific T cells detected by tetramer/dextramer. (C) Diagram representing the tumour  
707 size (diameter) and relative proportions of antigen-specific tumour infiltrating T cells  
708 over time. (D) Percentage of functional AH1- and GSW11-specific CD8<sup>+</sup> T cells. (E)  
709 Relative proportion of functional and non-functional antigen-specific tumour  
710 infiltrating T cells. (B, D; mean and s.e.m. of three mice at each time point; \*  $p < 0.05$ ,  
711 \*\*\*  $p < 0.001$ ).

712

713 **Figure 2. GSW11-specific T cells are exhausted in tumour challenged mice.** (A) A  
714 representative histogram showing PD-1 expression of functional and non-functional  
715 AH1- and GSW11-specific T cells. (B, C) Percentage of PD-1 expressing tumour  
716 infiltrating non-functional (B) and functional (C) AH1- and GSW11-specific T cells  
717 (B, C; mean and s.e.m. of at least three mice from two independent experiments; \*\*\*  
718  $p < 0.001$ ).

719

720 **Figure 3. Expression of PD-1 and PD-L1 on tumour infiltrating and LN resident**  
721 **regulatory T cells and tumour cells.** (A) Percentage of tumour infiltrating Tregs  
722 over time. (B, C) Expression of PD-L1 (B) and PD-1 (C) on Tregs in tumours and  
723 tumour draining LN. (D) Percentage and level of PD-L1 expression on CT26 tumour

724 cells prior to and during tumour challenge. (A-C; mean and s.e.m. of three mice at the  
725 indicated time points).

726

727 **Figure 4. Exhaustion of anti-tumour T cells is induced in the periphery and**  
728 **regulated by regulatory T cells.** Treg replete or depleted Balb/c mice were  
729 challenged with CT26 and anti-tumour T cell responses in spleens and tumour  
730 draining LN assessed. (A) A representative histogram showing the relative level of  
731 PD-1 expression on AH1- and GSW11-specific T cells as indicated. (B, C) Percentage  
732 of functional GSW11- (B) or AH1- (C) specific T cells in spleen and tdLN in Treg  
733 replete and depleted mice following tumour challenge over the indicated time course.  
734 (D-G) Proportion of PD-1 expressing non-functional (D, E) and functional (F, G) anti-  
735 GSW11 (D, F) or -AH1 (E, G) T cells in spleen and tumour draining LN in Treg  
736 replete and depleted mice following tumour challenge. (B-G; mean and s.e.m. of three  
737 mice at the indicated time points; d25 data only available for Treg depleted samples).

738

739 **Figure 5. GSW11-specific T cell clonalities are modulated by regulatory T cells.**  
740 Treg replete or depleted Balb/c mice were challenged with CT26 and the TcR  
741 expression of GSW11-specific T cells assessed. (A) Percentage of GSW11-specific  
742 CD8+ T cells expressing the indicating TcR V $\beta$  in Treg replete or depleted CT26  
743 challenged mice. (B) The relative proportion of TcR V $\beta$  usage in GSW11-specific T  
744 cells following tumour challenge (blue segments indicate TcR with high avidity and  
745 red indicate those with low avidity). (A; mean and s.e.m. of ten mice in three pools,  
746 B; mean of ten mice from three pools; \*  $p < 0.05$ , \*\*  $p < 0.01$ ).

747

748 **Figure 6. Tumour protective GSW11-specific CD8+ T cells have low TcR avidity.**

749 The TcR avidity of anti-GSW11 T cell oligoclones that showed either increased,  
750 decreased, or similar levels in tumour challenged Treg depleted mice was assessed  
751 using tetramer competition. (A, B) A representative histogram (A) and analysis of  
752 relative change in tetramer MFI (B) of the TcR tetramer competition assay in  
753 indicated TcR clones. (C) Relative avidity of indicated GSW11-specific T cell  
754 oligoclones following tetramer competition (C; mean and s.e.m. of at least three  
755 independent experiments; \*  $p < 0.05$ , \*\*  $p < 0.01$ , \*\*\*\*  $p < 0.0001$ ).

## Figure 1

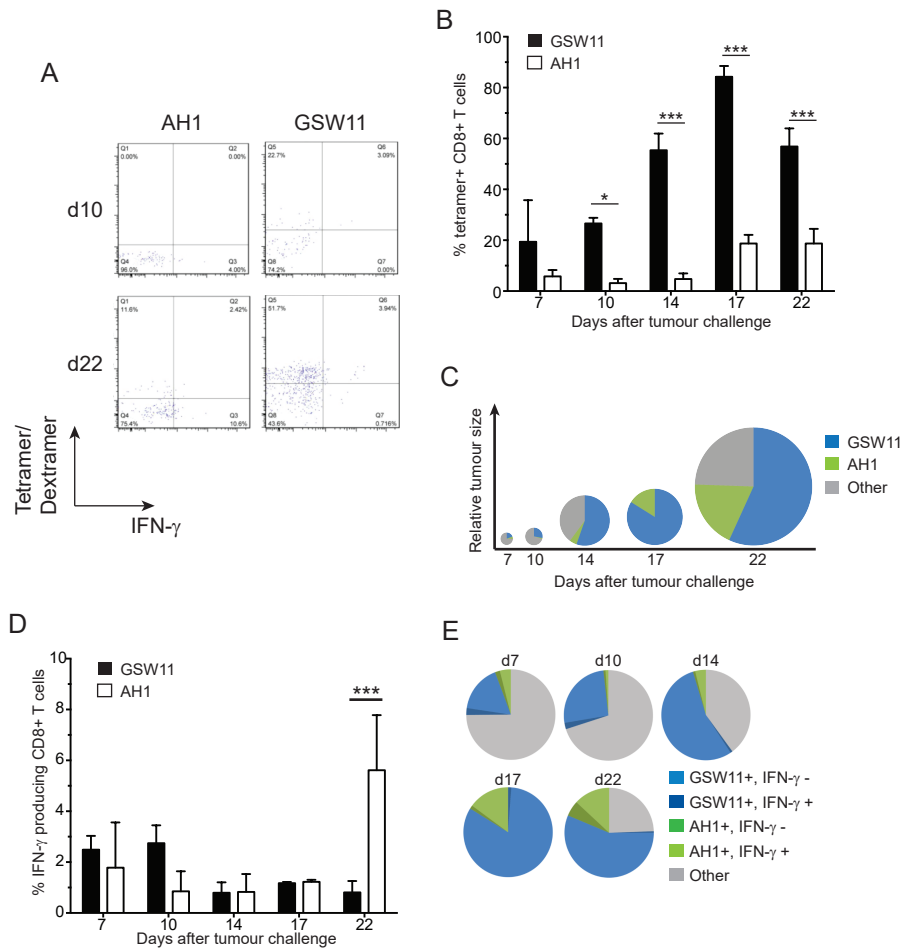



## Figure 2

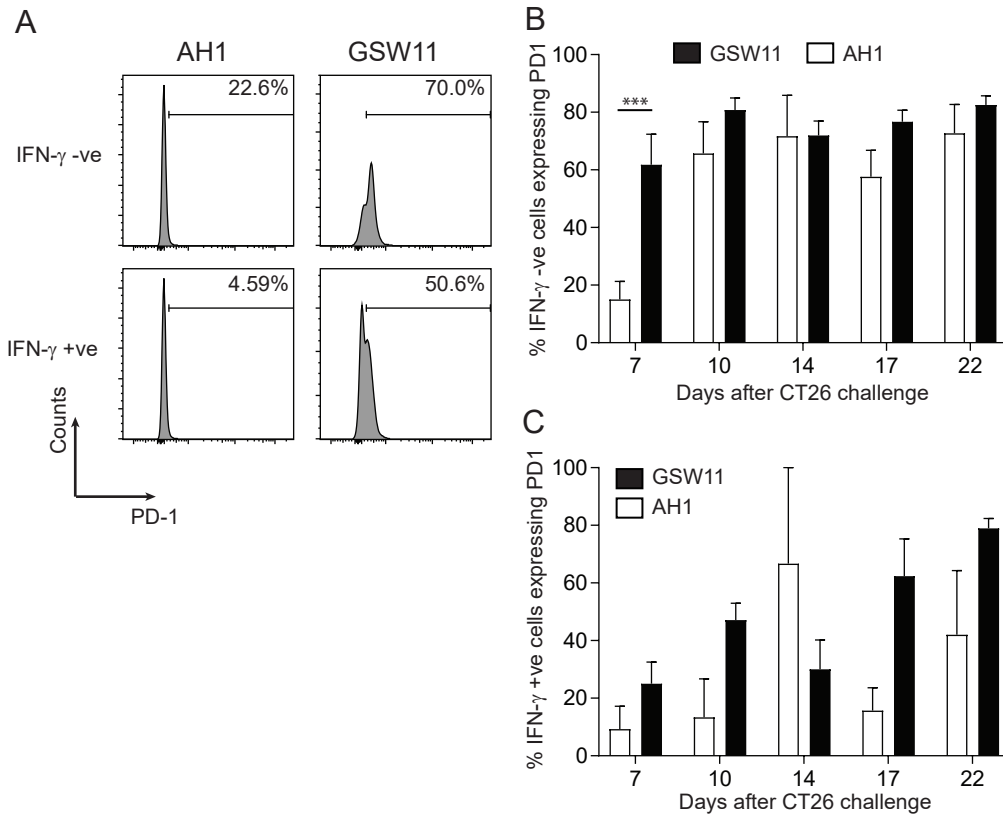

### Figure 3

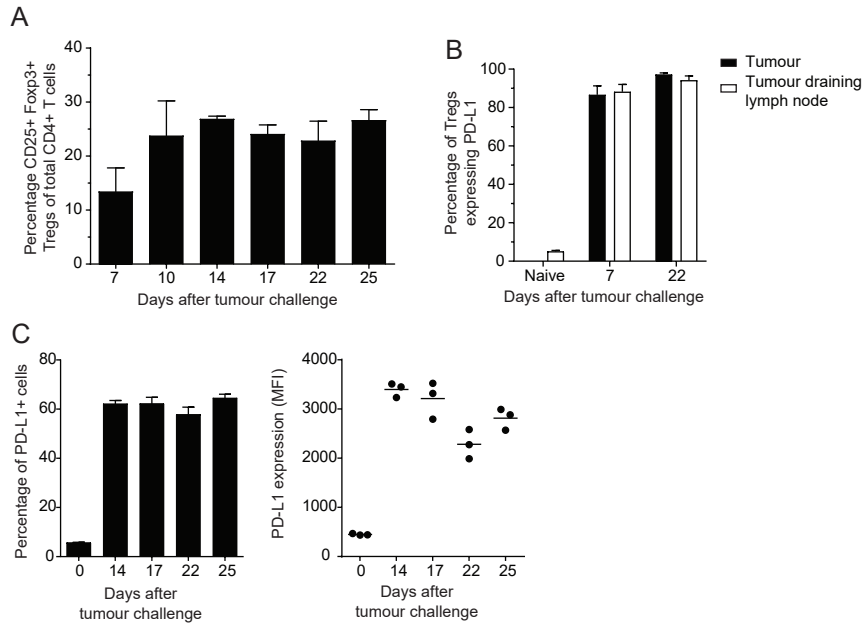

Figure 4

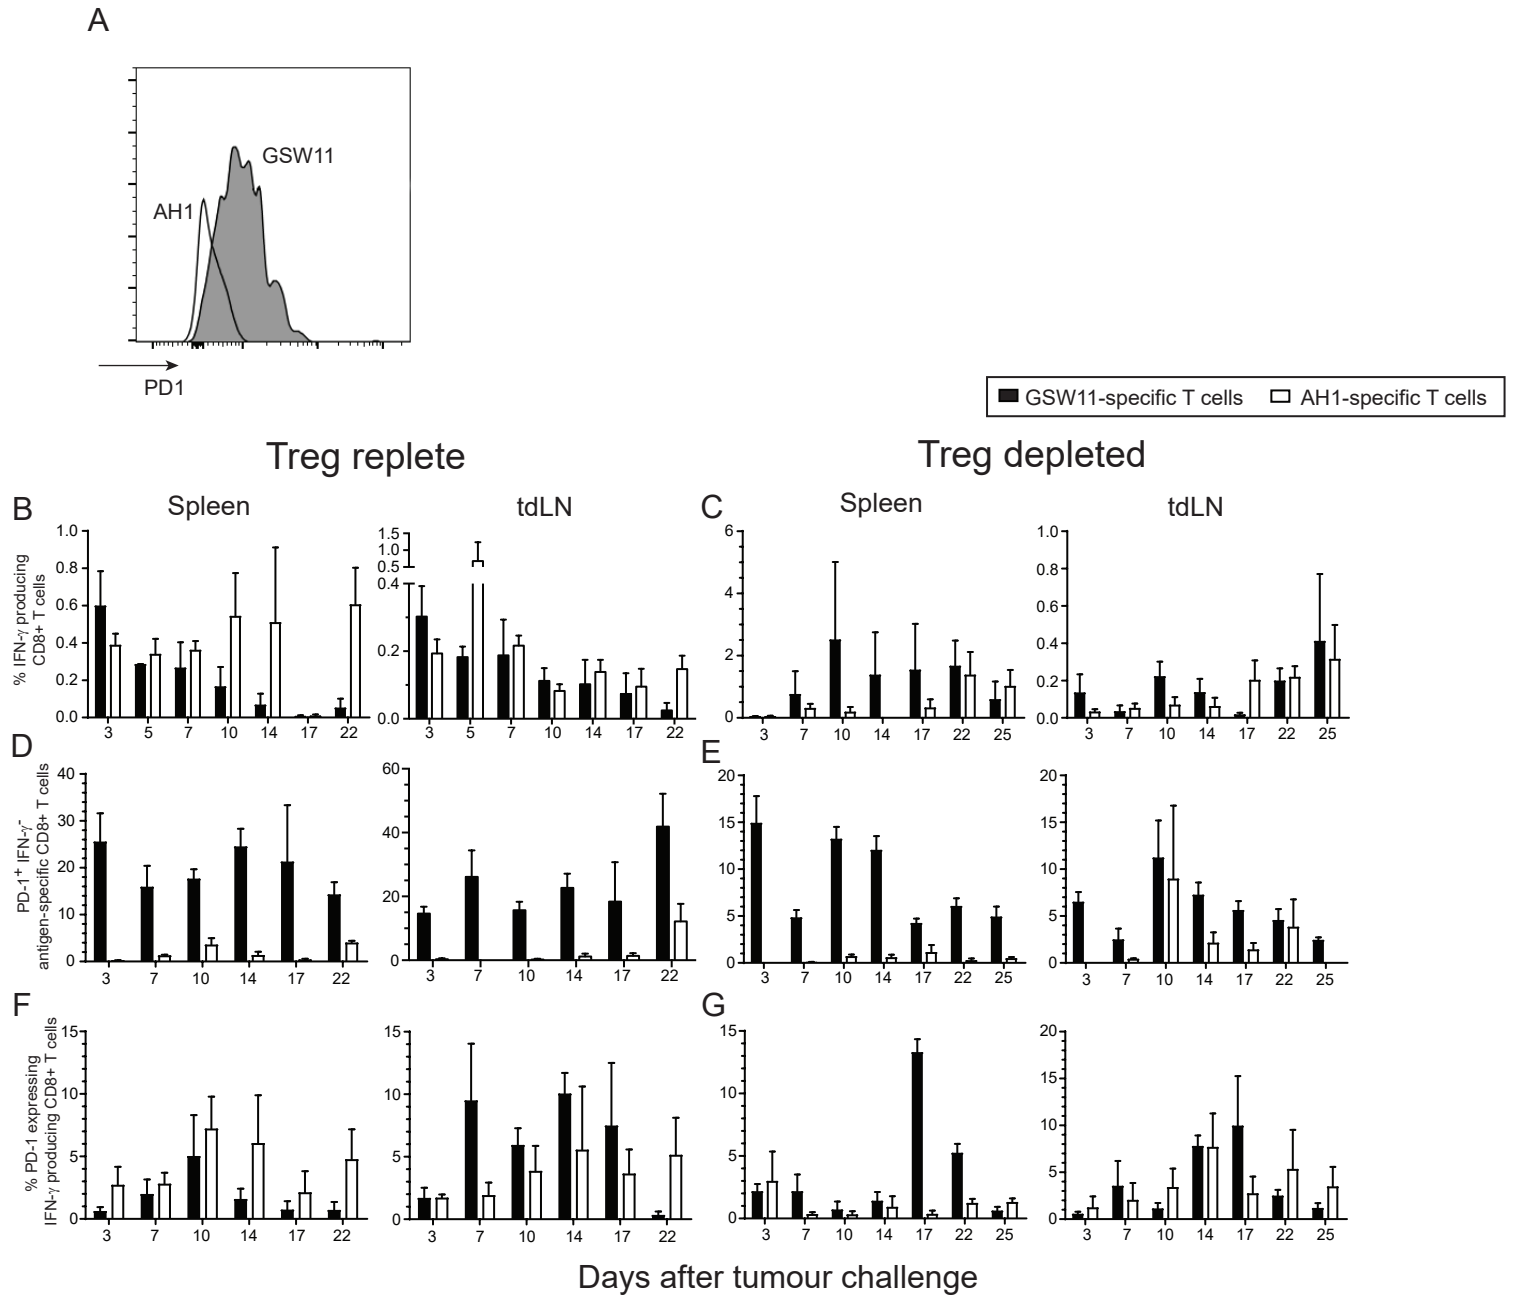

Figure 5

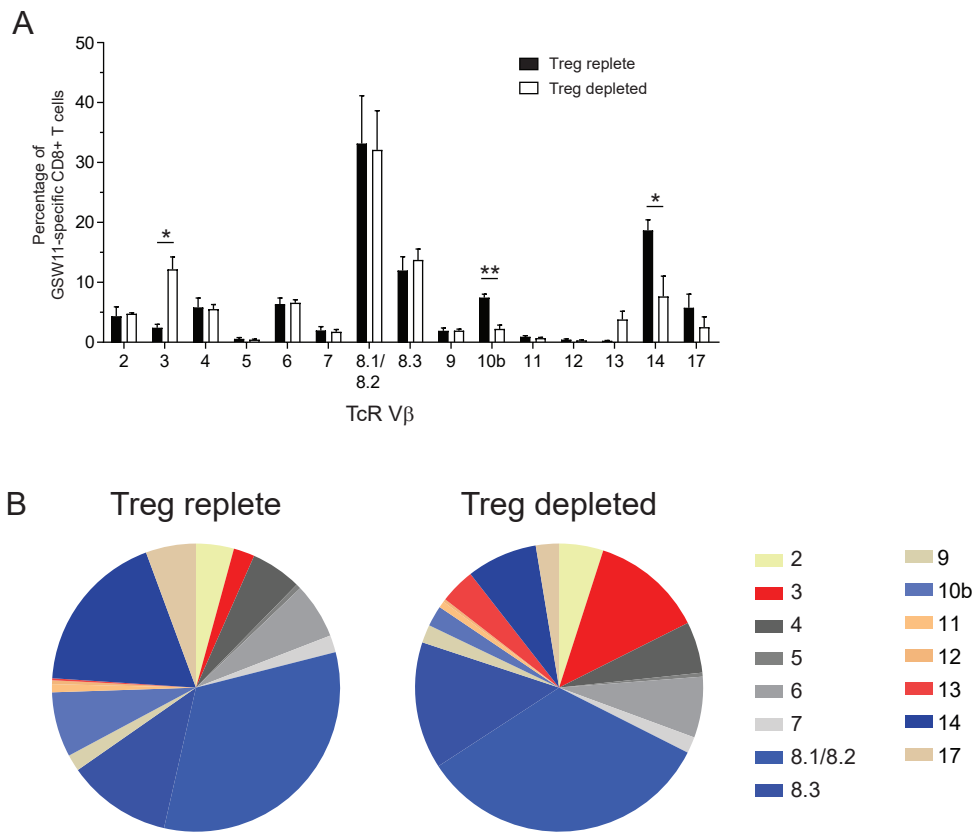

Figure 6

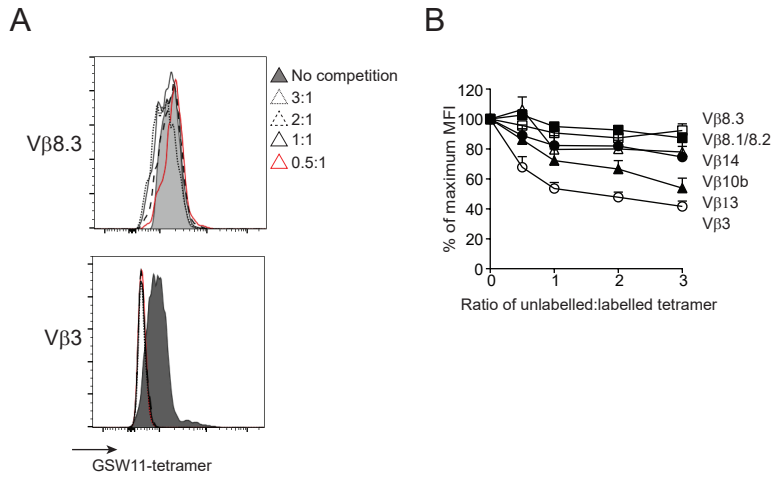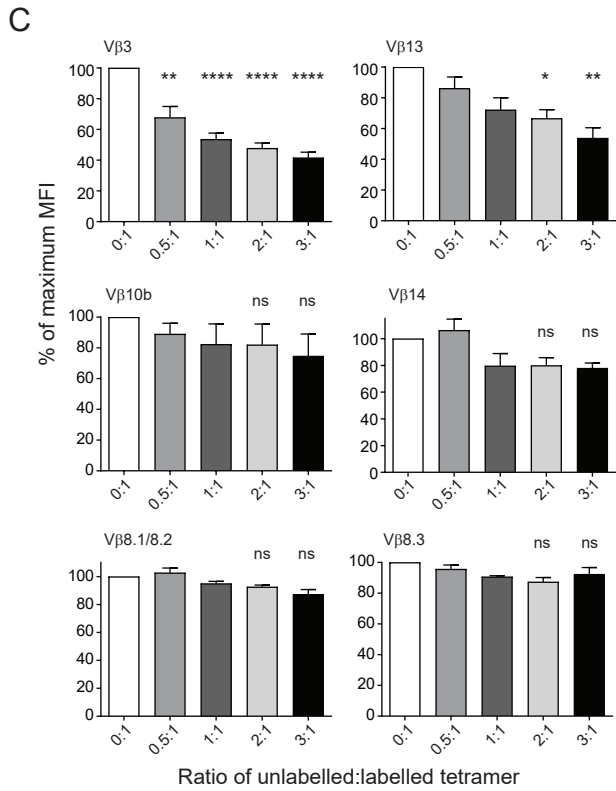

Source: https://www.biorxiv.org/content/10.1101/481515v1.full.pdf
