1 Protective low avidity anti-tumour CD8<sup>+</sup> T cells are selectively  
2 attenuated by regulatory T cells

3

4 Running Title: Tumour protective low avidity CD8<sup>+</sup> T cells

5

6 Sugiyarto G.<sup>\*</sup>, Prossor D.<sup>\*</sup>, Dadas O.<sup>\*</sup>, Elliott T.<sup>\*,†</sup>, James E.<sup>\*,†</sup>

7

8 <sup>\*</sup>Centre for Cancer Immunology, University of Southampton Faculty of Medicine,

9 University Hospital Southampton, Southampton, SO16 6YD, UK and <sup>†</sup>Institute for

10 Life sciences, University of Southampton, Southampton, SO17 1BJ, UK.

11

12

13

14 **Correspondence:**

15 Edd James

16 Centre for Cancer Immunology,

17 University Hospital Southampton,

18 Tremona Road,

19 Southampton SO16 6YD

20 Tel No. +44 2381205884

21 Fax No. +44 2381205152

22 Email: [eddjames@soton.ac.uk](mailto:eddjames@soton.ac.uk)

23

24

25

26

27 This work was supported by the Cancer Research UK Programme Grant A16997

28 awarded to E.J. and T.E.

## Abstract

Regulatory T cells (Treg) play a major role in the suppression of protective anti-tumour T cell responses. In the CT26 BALB/c murine model of colorectal carcinoma, Tregs differentially suppress responses to two characterised CD8<sup>+</sup> T epitopes, AH1 and GSW11, which results in an absence of detectable IFN- $\gamma$  producing GSW11-specific T cells in the spleen and lymph nodes of tumour challenged mice. Activation of GSW11-specific T cells correlates with protection against tumour growth. Here we show that GSW11-specific T cells are in fact induced in Treg-replete, CT26-bearing mice, where they make up the majority of tumour infiltrating CD8<sup>+</sup> lymphocytes, but exhibit a dysfunctional 'exhausted' phenotype. This dysfunctional phenotype is induced early in the anti-tumour response in draining lymph nodes, spleens and tumours and is significantly more pronounced in GSW11-specific T cells compared to other tumour-specific T cell responses. Depletion of Tregs prior to tumour challenge significantly reduces the induction of exhaustion in GSW11-specific T cells and correlates with altered T cell receptor (TcR) usage. Moreover, the avidity of GSW11-specific TcRs that expanded in the absence of Tregs was significantly lower compared to TcRs of cytotoxic T lymphocyte (CTL) populations that were diminished in protective anti-tumour responses. This indicates that Tregs suppress the induction of protective anti-tumour T cell responses and may signify that the induction of low avidity T cells, while being more susceptible to exhaustion are the most efficacious in tumour rejection.

## Introduction

CD8<sup>+</sup> T cell responses directed to tumours have been shown to occur in many human cancers, where they are a positive prognostic indicator (1-5). Backed by studies in preclinical mouse models, which clearly show that CD8<sup>+</sup> T cells are important in the clearance of tumours and may confer lifelong protection against malignancy (6, 7), immunotherapies aimed at boosting anti-tumour cytotoxic T lymphocytes (CTL) are showing promise in the clinic. Naturally occurring responses can be initiated during tumour growth to establish immunosurveillance in which a dynamic process of immunoediting can ensue; immunological pressure from anti-tumour CTL balances tumour elimination against the emergence of tumour escape variants with no accompanying net outgrowth of tumour (8). This process is responsible for shaping the immunogenicity of the tumour (9). Breakdown of this equilibrium leading to tumour outgrowth involves multiple factors, including the balance between T cell activatory (TcR engagement and co-stimulation) and inhibitory signals (exhaustion markers and immunosuppressive cytokines), and evasion of the T cell response through downregulation of antigen processing machinery or antigen loss. Therapeutic approaches designed to tip the balance back in favour of tumour elimination by providing activation agonists or blockade of inhibition is an attractive strategy that is currently investigated (reviewed in (10)). FoxP3<sup>+</sup> CD4<sup>+</sup> regulatory T cells (Treg) are important in establishing an immunosuppressive tumour microenvironment, and their infiltration into tumours is a negative prognostic biomarker (11) and a significant obstacle to successful immunotherapy, correlating with a poorer outcome in clinical trials (reviewed in (12)). Therefore, Treg depletion as a therapeutic option is being pursued in the clinic, based on studies in mice that showed rejection of transplanted tumours following ablation of Treg with anti-CD25 antibodies (13, 14).

One of the most widely used mouse models for preclinical testing of new immunotherapeutic drugs is the transplantable BALB/c derived colorectal tumour CT26 (15, 16). In this model, we have shown that depletion of Tregs induces robust protective anti-tumour immunity that effects tumour rejection in ~90% of mice, similar to responses observed in other mouse tumour models (13, 17). The CT26-immune mice developed memory CTL responses and were able to reject a second challenge with CT26 as well as tumour lines of different histological origin following recovery of Tregs to normal levels. Anti-tumour responses in these mice are focussed on two epitopes derived from *gp90*; AH1 (SPSYVYHQF, (18)) and GSW11 (GGPESFYCASW, (17)). The anti-GSW11 response is more sensitive to Treg suppression *in vivo*, illustrated by the fact that functional (IFN- $\gamma$ -producing) anti-GSW11 CTL can only be detected in tumour draining lymph nodes (tdLN) in the absence of Treg whereas anti-AH1 CTL are detected whether or not Treg are present (17). Anti-GSW11 CD8<sup>+</sup> T cells deliver the most potent anti-tumour response characterised by their ability to reject tumours expressing very low levels of antigen (13, 17).

To investigate the basis of differential suppression of the GSW11-specific T cell response further, we utilised peptide-specific tetramers, to detect both functional (IFN- $\gamma$ <sup>+</sup>) and inactivated (IFN- $\gamma$ <sup>-</sup>) antigen-specific T cells. We show that in Treg replete tumour-bearing mice GSW11-specific T cells made up the majority of CD8<sup>+</sup> tumour infiltrating lymphocytes (TIL), but exhibit an exhausted phenotype characterised by PD-1 expression and absence of IFN- $\gamma$  production upon stimulation. We also found that Treg depletion permitted the proliferation of GSW11-specific T cells with lower TcR/MHC avidity suggesting that this population may be more

- 99 efficacious at rejecting tumour than their higher avidity counterparts with the same
- 100 epitope specificity.

## Materials and Methods

### Mice, Antibodies and *In vivo* depletion

BALB/c mice were bred under specific pathogen-free conditions in Southampton. Female or male mice (6-8 weeks old) were used in all experiments and during experimental procedures mice were housed in conventional facilities. Hybridomas secreting CD25 (PC61, rat IgG1) specific mAb have been described previously (13). For depletion, mice received intraperitoneal (i.p.) injection of 1 mg of mAb PC61 in 100  $\mu$ l on days -3 and -1 prior to tumour challenge.

### Tumour cells and *In vivo* challenge

CT26 tumour cells (American Type Culture Collection; ATCC) were maintained in RPMI (Sigma) supplemented with 10% FCS (Globepharm), 2 mM L-glutamine, penicillin/streptomycin (Sigma), 50  $\mu$ M 2-mercaptoethanol, 1 mM sodium pyruvate (Gibco-BRL) and 1mM HEPES (PAA) and confirmed to be mycoplasma free. In all experiments, mice were injected subcutaneously (s.c.) with  $10^5$  tumour cells in endotoxin-low PBS. For analysis of PD-L1 expression, tumour cells were stained with  $\alpha$ -PD-L1 (10F.9G2; Biolegend) prior to s.c. injection and after 14-25 days of tumour growth. All flow cytometry data acquisition was carried out on a FACS Canto II (BD Biosciences) and all data analysed with FlowJo Software (Treestar). Tumour cells were gated on live, single cells and the proportion of PD-L1<sup>+</sup> cells assessed.

### DNA construct

The H2-D<sup>d</sup> single chain trimer (SCT) construct incorporating a *gp120* HIV peptide (a kind gift from Dr. Keith Gould) was mutated into the GSW11 peptide via site directed mutagenesis (SDM) PCR using KOD HotStart polymerase (Merck Biosciences)

according to manufacturer's instructions. The transmembrane domain of H2-D<sup>d</sup> was substituted for a biotinylation site using overlapping extension PCR. In addition, a disulphide trap was incorporated into the construct (19) to tether the GSW11 peptide onto the MHC I binding groove.

### **Tetramer generation**

Tetramers were produced with the help and advice of the Cancer Research UK/Experimental Cancer Medicine Centre Protein Core Facility (Cancer Sciences Unit, University of Southampton, Southampton, U.K.) with few modifications. The GSW11-SCT construct containing H2-D<sup>d</sup>,  $\beta$ 2m and GSW11 peptide was cloned into the pET-3a expression vector (Novagen) and expressed in BL-21 CodonPlus RIPL cells (Stratagene). Concentrated refolded complexes were purified on a HiLoad 26/60 Superdex 200 column (GE Healthcare). Biotinylation was achieved with 50 $\mu$ M d-biotin and 1 $\mu$ g/ml biotin protein ligase (Avidity) at 16°C overnight and then passed through the column a second time. Biotinylated monomers were dialysed and subsequently stored in 16% glycerol in PBS or tetramerised by incubation with 1:4 molar ratio of PE-labelled streptavidin (Thermofisher) at 4°C. Each batch of tetramers were tested for binding against the GSW11-specific T cell hybridoma, CCD2Z. For the analysis of AH1-specific T cells, AH1-specific dextramers were used (Immunodex).

### **Isolation and analysis of antigen-specific T cells and Tregs**

Spleens, tumour draining lymph nodes and tumours from CT26 challenged mice (Treg depleted or replete) were harvested between days 3-25 and disaggregated. CD8<sup>+</sup> T cell responses to CT26 antigens GSW11 and AH1 were assessed using

antigen-specific tetramers and the production of IFN- $\gamma$  following peptide stimulation. CD8<sup>+</sup> T cells, APCs and peptides/tumours were cultured together for 4 hours in the presence of brefeldin A (BD biosciences) before being stained for cell surface  $\alpha$ -CD8 (63-6.7; BD biosciences), antigen-specific tetramer/dextramer,  $\alpha$ -PD-1 (RMPI-30; eBiosciences) and intracellular  $\alpha$ -IFN- $\gamma$  (XMG1.2; BD biosciences) using the Cytofix/Cytoperm kit (BD biosciences) according to manufacturer's instructions. Cells were enumerated by flow cytometry. Numbers reported are those above the background response of T cells alone, with no peptide stimulation. Single cell CD8<sup>+</sup> lymphocytes were gated and assessed for tetramer binding and expression of IFN- $\gamma$ . For analysis of PD-1, CD8<sup>+</sup> and tetramer<sup>+</sup> were gated and assessed for PD-1 and IFN- $\gamma$  expression. Within these gates the T cell receptor clonality of GSW11-specific T cells was assessed using a panel of 15 V $\beta$ -specific antibodies (BD biosciences). First, total CD8<sup>+</sup> T cells were purified using a CD8 magnetic isolation negative selection kit (Miltenyi) according to manufacturer's instructions. Purified CD8s were stained with GSW11-specific tetramer,  $\alpha$ -V $\beta$  kit,  $\alpha$ -CD8 and analysed by flow cytometry. For the analysis of Tregs, cells were stained for cell surface  $\alpha$ -CD4 (RM-4-5; BD biosciences),  $\alpha$ -CD25 (7D4; BD biosciences),  $\alpha$ -PD-1 and  $\alpha$ -PD-L1 (10F.9G2; Biolegend) and intracellular staining with  $\alpha$ -FoxP3 (FJK-16S; eBiosciences).

# **Tetramer competition assay**

Spleens and tumour draining lymph nodes were pooled from Treg depleted or replete mice. CD8<sup>+</sup> T cells were purified from disaggregated tissues using magnetic isolation by negative selection (Miltenyi). Purified CD8<sup>+</sup> T cells were incubated with 50 nM of dasatinib (New England Biolabs) to prevent TcR internalisation before staining with



$\alpha$ -CD8,  $\alpha$ -TCR  $\beta$ -chain (H57-597; Biolegend) and 5  $\mu$ g of PE-labelled GSW11-specific tetramers. After two washes, cells were incubated with bleached tetramer at varying ratios of the initial PE-labelled tetramers: 2.5 $\mu$ g, 5 $\mu$ g, 10 $\mu$ g or 20 $\mu$ g per test. Bleached tetramers were tested for no/minimal PE-fluorescence before use. The  $\beta$ -chain TCR staining was included to confirm the decreasing levels of PE-staining was due to the fluorescently labelled tetramer being out-competed and not due to TcR internalisation.

### **Statistical analysis**

Analyses were performed using Prism software (GraphPad, San Diego, CA). The  $p$  values were calculated using either two way ANOVA with Dunnett's post-test or two-tailed unpaired t test (\* $p < 0.05$ ; \*\* $p < 0.01$ ; \*\*\* $p < 0.001$ ; \*\*\*\* $p < 0.0001$ ).

## Results

### *Tumour infiltrating GSW11-specific CD8<sup>+</sup> T cells are exhausted in CT26 tumour-bearing mice*

Recent studies using mouse models have shown that many tumour infiltrating anti-tumour CD8<sup>+</sup> T cells have an exhausted phenotype, characterised by PD-1 expression and a failure to express cytokines IL-2, TNF- $\alpha$  and IFN- $\gamma$  (20, 21). Little is known about whether, or to what extent, development of this phenotype relates to T cell specificity. Clearly, a relationship exists inasmuch as T cell activation via TcR is a prerequisite for the induction of exhaustion (reviewed in (22)). Given our previous observations of differential suppression of anti-CT26 responses with different specificity (17), we sought to investigate the induction of exhaustion in both AH1 and GSW11-specific CD8<sup>+</sup> T cells in CT26 tumour bearing mice using antigen-specific tetramers as specificity probes for T cell populations, independent of their functional phenotype. Due to the poor binding affinity of GSW11 for H2-D<sup>d</sup> (17) we utilised single chain trimer tetramers with GSW11 tethered to the binding groove using a short linker polypeptide (19), allowing stable expression of GSW11-D<sup>d</sup> monomers. In CT26 challenged Treg replete mice, GSW11-specific T cells were the most abundant CD8<sup>+</sup> T cell population in tumours, making up >50% of all CD8<sup>+</sup> T cell infiltration after 14 days of tumour challenge (Figure 1A, B, C). However, similar to the situation seen in many human cancers, these infiltrating CD8<sup>+</sup> T cells do not confer protection, and tumours continue to grow in these animals. The population of GSW11-specific T cells was significantly larger than AH1-specific T cells, which constituted a maximum of 20% of infiltrating T cells at later stages of tumour challenge (d17 and d22; Figure 1B, C). Notably, while the two T cell populations (anti-GSW11 and -AH1 CD8<sup>+</sup> T cells) made up the majority of tumour infiltrating CD8<sup>+</sup> T cells (>60%) at later time

points (d14-22), they were in the minority in early anti-tumour responses (d7-10, Figure 1C). Thus, an initial broad-specificity polyclonal TIL response becomes focussed on two *gp90* derived epitopes during tumour growth (Figure 1C). We next investigated the function, after *ex vivo* peptide stimulation, of GSW11- and -AH1 specific CD8<sup>+</sup> T cells harvested from tumours during the course of the challenge. The vast majority of GSW11-specific CD8<sup>+</sup> T cells were unable to produce IFN- $\gamma$ , with a decrease in functional T cells as the tumour progressed (Figure 1D, E). Most of the AH1-specific T cells were also non-functional, although, consistent with earlier studies showing their presence in tdLN and spleen (17), there were significantly more functional AH1-specific T cells at d22 compared to GSW11 (around 6% compared to <1% functional; Figure 1D, E). This minor population of functional tumour-specific T cells were, however, unable to control tumour growth.

To investigate whether the lack of effector function in anti-tumour T cells correlated with the expression of checkpoint molecules commonly associated with T cell dysfunction in tumours, we assessed the expression of PD-1 on GSW11- and AH1-specific T cells following tumour challenge. The majority of non-functional (IFN- $\gamma$ <sup>-</sup>) tumour infiltrating T cells of both specificities expressed PD-1 indicating the induction of an exhausted phenotype (50-80%; Figure 2A, B). Anti-GSW11 CD8<sup>+</sup>T cells acquired the non-functional phenotype more rapidly and to a greater extent compared to AH1-specific T cells. Thus, a greater proportion of GSW11-T cells were PD-1<sup>+</sup> IFN- $\gamma$ <sup>-</sup> at the first time-point, d7 ( $p$  =<0.001), which was sustained throughout tumour growth (Figure 2B). Interestingly, a proportion of the small number of functional (IFN- $\gamma$ <sup>+</sup>) GSW11- and AH1-specific T cells also expressed PD-1, ranging from ~10% for AH1-specific T cells at day 7 to ~80% of GSW11-specific T cells at day 22 (Figure 2C), indicating that these T cells are both activated and functional.

These results indicate that tumour infiltrating GSW11-specific T cells are highly susceptible to the induction of an exhausted phenotype.

*The presence of regulatory T cells correlates with PD-1 expression on tumour infiltrating lymphocytes.*

The tumour microenvironment has been shown to play a crucial role in modulating anti-tumour T cell responses *in vivo* (23, 24) with the presence of tumour-infiltrating Tregs impacting negatively on tumour rejection (11). We therefore investigated the effect of Treg on the induction of exhaustion in infiltrating CD8<sup>+</sup> T cells. In a temporal analysis of TIL, Tregs comprised around 15% of total CD4<sup>+</sup> T cells at the earliest time point examined (d7). This rose to ~25% by d10 where it remained for the duration of the tumour challenge (Figure 3A). Interestingly, the accumulation of Tregs in the tumour followed similar kinetics to that observed for the loss of effector function in GSW11-specific T cells (Figure 2B and 1D). Most Tregs expressed PD-L1 in both tumour and the tumour draining LN (tdLN) from the earliest time-point onwards (Figure 3B), suggesting that Treg suppression of GSW11-specific T cells may be mediated via PD-1/PD-L1 interaction. Since tumour-specific T cells also engage with tumour cells for activation, we examined the expression of PD-L1 on tumour cells over 25 days following inoculation. *In vitro* CT26 expressed low levels of PD-L1, however this increased significantly both in terms of the proportion of CT26 expressing, and the level of expression following their seeding and growth *in vivo* (Figure 3C). These results suggest that during initial stages of growth, the tumour provides a pro-inflammatory microenvironment, characterised by IFN- $\gamma$  producing T cells (and perhaps iNKT/NK cells). This rapidly changes to an immunosuppressive microenvironment in both the tumour and tdLN, characterised by upregulation of

inhibitory ligands by the tumour, infiltration of Treg, and upregulation of PD1 on infiltrating tumour-specific CD8+ T cells accompanied by their loss of effector function.

# *Dysfunction of anti-tumour T cells is induced in the periphery*

We next investigated whether GSW11- and AH1-specific T cells are primed effectively to induce T cell effectors. Examination of naïve T cell populations (GSW11 and AH1) showed that both expressed low levels of PD-1 (consistent with previous studies; (25)) with expression on GSW11-specific T cells being slightly greater than AH1-specific T cells (Figure 4A). Following CT26 seeding in Treg replete mice we observed functional (IFN- $\gamma$  producing) AH1- and GSW11-specific T cells in spleen and tdLN, appearing at d3 and detectable through to the humane end point at d22, with AH1-specific T cells dominating over GSW11-specific T cells at later time points (Figure 4B and C). AH1-specific responses were similar throughout the experiment in lymphoid organs, with the greatest response in spleen (Figure 4C). By contrast, GSW11-specific IFN- $\gamma$  responses were greatest at early time points (d3-10) and declined over time (Figure 4B). This confirmed that a co-dominant, functional (IFN- $\gamma$ ) response to AH1 and GSW11 was established in tdLN and spleen immediately following tumour seeding in Treg replete mice and that over time, progressive loss of functional anti-GSW11, but not anti-AH1-specific T cells, was seen. In Treg depleted mice, in which tumours are rejected, GSW11-specific T cells were dominant at most time points, in particular at time points d3-17, in both spleen and tdLN with the greatest response observed in spleen (in line with our previous observations (17) and Figure 4B and C). In addition, the magnitude of anti-GSW11 responses were much greater in Treg depleted compared to Treg-replete mice. AH1-

specific responses became co-dominant after d17. Indeed, the magnitude of the anti-AH1 response was not sensitive to the presence or absence of Treg (Figure 4C). Analysis of PD-1 expression on non-functional (IFN- $\gamma$ <sup>-</sup>) T cells revealed that a significant proportion (~20%) of GSW11-specific T cells in the spleen and tdLN expressed PD-1 throughout the time-course, even at the earliest time-point of 3 days; rising to ~40% at d22 in tdLN (Figure 4D). By contrast, only a very small proportion of IFN- $\gamma$ <sup>-</sup> AH1-specific T cells expressed PD-1, with a maximum of ~10% of cells in tdLN reached by d22 (Figure 4E). A similar pattern of dysfunctional GSW11- and AH1-specific T cells was observed in the spleens of tumour challenged Treg depleted mice, although, there was a much greater reduction in GSW11-specific T cells compared to AH1, illustrating the differential suppression of anti-CT26 T cells by Tregs ((17) and Figure 4D and E). Importantly, the proportion of dysfunctional GSW11-specific T cells was significantly lower in tdLN of Treg depleted mice (d7 and d22; Figure 4D), suggesting that Treg can exert their effect on T cells in tdLN and spleen and their removal reduces the induction of dysfunction in tumour-specific T cells following priming.

It is likely that the precursors of IFN- $\gamma$ <sup>-</sup>, PD-1<sup>+</sup> T cells are IFN- $\gamma$ <sup>+</sup>, PD-1<sup>+</sup> (22), therefore, to gain a better understanding of the dynamics of transition from functional to dysfunctional phenotypes we assessed PD-1 expression on functional (IFN- $\gamma$ <sup>+</sup>) CD8<sup>+</sup> T cells. In Treg replete mice, levels of PD-1<sup>+</sup> IFN- $\gamma$ <sup>+</sup> GSW11- and AH1-specific T cells were similar, although more AH1-specific T cells were observed at later time points in spleens (d14-22; Figure 4F and G). Similar levels of PD-1<sup>+</sup> IFN- $\gamma$ <sup>+</sup> GSW11- and AH1-specific T cells were observed in Treg depleted mice, however more PD-1<sup>+</sup> IFN- $\gamma$ <sup>+</sup> GSW11-specific T cells were seen at d17 and d22 in spleens (Figure 4F and G). These results indicate that, although the level of primed functional

AH1- and GSW11-specific responses is similar, GSW11-specific T cells are more susceptible to the induction of a dysfunctional phenotype.

# *Diversity of GSW11-specific T cell responses in Treg depleted mice*

Previous studies have shown that the presence of Treg during priming to a transplantation antigen inhibits the priming of T cells with low-avidity TcR (26). To investigate this possibility in the context of Treg-dependent tumour rejection, we first investigated the oligoclonality of the anti-GSW11 T cell response with a view to identifying oligoclonal populations that are preferentially suppressed by Treg. To this end, we determined TcR V $\beta$  usage of GSW11-specific T cells from CT26 challenged Treg replete mice using a panel of V-region specific antibodies. This revealed that the anti-GSW11 response was very diverse with at least 15 different clonotypes observed (Figure 5A and B). Despite the broad response only three V $\beta$  represented >10% of GSW11-specific T cells (V $\beta$ 8.1/8.2, V $\beta$ 8.3 and V $\beta$ 14; Figure 5A) indicating a predominantly oligoclonal response despite the broad V $\beta$  usage. In Treg depleted mice the anti-GSW11 response was similarly broad, although some populations were significantly increased, such as those expressing V $\beta$ 3 and V $\beta$ 13 and others diminished, such as V $\beta$ 10b and V $\beta$ 14 compared to Treg replete responses (Figure 5A, B). Intriguingly, some responses such as V $\beta$ 8.1/8.2 and V $\beta$ 8.3 (which make up ~30% and ~12% of the response respectively) were largely unchanged following Treg depletion. These findings suggest that Tregs modulate the anti-tumour GSW11-specific response by preferentially suppressing some T cell clones leading to the expansion of others.

# *Tregs target lower avidity anti-GSW11 T cells*

We next estimated the TcR avidity of anti-GSW11 T cell oligoclonal populations that were preferentially suppressed by Treg (V $\beta$ 3 and V $\beta$ 13) compared to oligoclonal populations that were largely unaffected by the presence of Treg (V $\beta$ 8.1/8.2 and V $\beta$ 8.3), using tetramer competition assays as described previously (Figure 6A and (27)). The two dominant T cell oligoclonal populations that expanded following Treg depletion, V $\beta$ 3 and V $\beta$ 13, had a lower avidity compared to V $\beta$ 8.1/8.2 and V $\beta$ 8.3 T cells, which had similar populations whether Tregs were present or not (Figure 6B and C). In addition, two oligoclonal populations, V $\beta$ 10b and V $\beta$ 14, which were proportionally better represented in Treg replete mice, displayed a high avidity similar to that observed for V $\beta$ 8.1/8.2 and V $\beta$ 8.3 T cells (Figure 6B and C). Levels of cell surface TcR  $\beta$  chain were similar regardless of the amount of competing tetramer added (Supplementary figure 1). This confirmed that the reduction in tetramer staining was due to competition and not decreased TcR. In pooled samples from groups of 3/4 mice, these low avidity T cells account for ~16% of the total anti-GSW11 response in Treg depleted animals compared to ~2.5% in Treg replete animals (red shades; Figure 5B). In addition, high avidity T cells make up >70% and ~55% of the total anti-GSW11 T cell response in Treg replete and depleted mice respectively (blue shades; Figure 5B). This indicates that sensitivity of a T cell to Treg suppression might be linked to TcR avidity, with lower avidity T cells preferentially targeted. Therefore, in the CT26 model, Treg depletion results in the elaboration of a tumoricidal GSW11-specific T cell response, which appears to correlate with preferential expansion of some low avidity GSW11-specific sub-clones. The response in Treg depleted mice represents a 6-fold increase in low avidity TcR, which make up ~1/6 of the GSW11-specific response compared to only 1/40 in Treg replete mice.



## Discussion

Immune surveillance of cancers starts with the priming of T cells to tumour associated antigens (TAA) and their infiltration into the diseased tissue. Here, their anti-tumour function is modulated by the evolving microenvironment, often leading to tumour escape via multiple mechanisms including the induction of T cell tolerance/anergy (through lack of co-stimulation during priming) or exhaustion (through the progressive loss of effector function following activation) (22, 28). Using antigen-specific multimers, we show that, in a commercially important preclinical mouse model, growing CT26 tumours are highly infiltrated with tumour-specific CTL recognising one of two non-mutated epitopes (GSW11 and AH1) from a single highly abundant TAA, *gp90*. Most TIL, however, exhibit an exhausted phenotype, which is at least in part mediated by Tregs.

In human cancer, high levels of T cell infiltration generally correlate with good prognosis. This infiltration is marked by a signature that includes increased transcription of genes associated with antigen processing and presentation (MHC I and MHC II), T cell markers (CD8, CD4, CD3) and genes associated with T cell homing (*CCL2*, *CCL3*, *CCL4*, *CXCL9*, *CXCL10* – the latter two being CD8+T-cell specific), signalling (ICOS, IRF1) and CTL function (granzymes, IFN- $\gamma$ ) (29, 30).

These are all consistent with the tumour milieu supporting ongoing peptide:MHC I (pMHC I)-driven T cell proliferation via TcR engagement. However, because of their secretion of the inflammatory cytokine IFN- $\gamma$ , CD8+ TIL also drive evolution of the immunosuppressive microenvironment including expression of PD-L1, IDO and the infiltration of Tregs (31). In addition, T cells derived from highly infiltrated tumours express the highest levels of inhibitory receptors (such as PD-1) (31). Immunotherapy targets all three key stages of anti-tumour immunity: priming, infiltration and

regulation, and the gene signature for T cell inflamed (so-called ‘hot’) tumours encompasses patterns of differentially expressed transcripts associated with positive responses to checkpoint blockade immunotherapy (PD-1, PD-L1, CTLA4) (32).

The CT26 tumour microenvironment resembles cancers with a strong T cell inflamed phenotype, and a signature that includes elevated transcripts for T cell infiltration and activation, CD8, CD4, CD3, CD45, CD62L, CD80, CD86, CD40, OX40L, CD25 and immunosuppression including FoxP3, CTLA-4 and IDO (32). Indeed, we show here that although the tumour mass is infiltrated with tumour-specific CD8<sup>+</sup> T cells, they are functionally inert. Despite the obvious differences between spontaneously arising cancer and a transplantable mouse model, studies that have directly compared spontaneous and transplantable tumour models in mice have found only small differences in the tumour-host interaction including immune gene profiles (32, 33). Thus, our time-course of CT26 growth might reasonably approximate to a model for the evolution of the tumour-immune interaction in spontaneously arising cancers in terms of immune-editing and the development of host immune modulation mechanisms within the microenvironment. This is encouraging because transplantable models are more experimentally tractable and permit a more rapid turnaround of preclinical immunotherapy studies.

With this in mind, we observed two key features of the CT26:BALB/c interaction that are relevant to understanding human disease and its response to immunotherapy. Firstly, Treg can differentially suppress different CTL clones recognising TAA and this even applies to CTL recognising the same pMHC I complex; and secondly that differential suppression of GSW11 and AH1-specific T cells, characterised by upregulation of PD-1 expression and loss of effector function (IFN- $\gamma$  production) was observed very early after tumour challenge (d3) in tdLN. This

indicated that a large proportion of GSW11-specific CD8<sup>+</sup> T cells were dysfunctional at the site of priming.

The early preferential suppression of anti-GSW11 T cells persists in peripheral tissues where a disparity between dysfunctional GSW11- and AH1-specific T cells is evident in tdLN and spleen. By contrast, in tumours, the difference between GSW11 and AH1 T cells diminishes after d10. This difference between tdLN and tumour indicates that there may be separate mechanisms that operate to establish T cell dysfunction at the early priming and late effector phase. The differential induction of dysfunction in GSW11 at early time points in tdLN, which is significantly reduced in the absence of Tregs, suggests that Tregs play a key role in this process. The rapid expression of PD-L1 on Tregs and PD-1 expression on GSW11-specific T cells indicates this may be an important interaction. Indeed, stimulation of PD-1 (rapidly upregulated following activation) by PD-L1 expressed on antigen presentation cells can cause T cell anergy, defined by reduced proliferative capacity, in a peptide induced model (34). The difference observed in PD-1 expression between AH1- and GSW11-T cells may therefore be a reflection of the relative susceptibility to Treg suppression at the priming stage mediated by PD-1/PD-L1 interaction. Once at the tumour, there is much less difference between AH1 and GSW11 with respect to a dysfunctional 'exhausted' phenotype. This change may be due to the increased expression of PD-1 on AH1-T cells, similar to that observed on GSW11-T cells at the tumour, due to continued antigenic stimulation (22). In addition, the more suppressive microenvironment at the tumour site with PD-L1 expression on tumour cells as well as Tregs, which accumulate over time, and the presence of immunosuppressive cytokines such as TGF- $\beta$ , may overcome any ability of AH1-specific T cells (and to a lesser degree GSW11-T cells) to resist the induction of exhaustion.

441           The presence of Tregs in several cancer types is a negative prognostic  
442   indicator. In addition, tumour-infiltrating Tregs have been shown to express gene  
443   signatures, including markers of activation and function, which distinguish them from  
444   not only blood Tregs, but also tissue resident Tregs from healthy tissue of the same  
445   origin (35, 36). Clinical trials are underway to determine the outcome of agents  
446   designed to reduce Treg numbers by targeting the IL-2 receptor or GITR. To date  
447   these results have been varied, with daclizumab (anti-CD25) reducing Treg numbers  
448   in patients while allowing the induction of T cell responses to targeted tumour  
449   antigens (37, 38) and a phase 1 trial of an anti-GITR antibody (TRX518) decreasing  
450   Treg numbers in the tumour and circulating blood (39). However, depletion of Tregs  
451   in stage IV melanoma with an IL-2/diphtheria toxin conjugate (DAB/IL-2) showed  
452   partial responses in only 16.7% of patients, although there was a greater one year  
453   survival in partial responders compared to those with progressive disease (80% vs.  
454   23.7%; (40)). This study provides a fuller mechanistic framework for the further  
455   rational development of Treg-targeted immunotherapy. Treg suppression of GSW11-  
456   specific T cells primarily affected those with lower avidity TcR. These clones  
457   expanded in the absence of Tregs, and correlated with survival, suggesting they are  
458   important in tumour rejection. It will be interesting to know whether these expanded  
459   CTL have a similar profile to the recently described CD103<sup>+</sup> CD8<sup>+</sup>T<sub>RM</sub> that  
460   characterise T cell infiltrates of NSCLC associated with prolonged survival (41). The  
461   expansion of protective low Ka T cell clones in Treg depleted mice is consistent with  
462   previous studies. For example, Pace et al showed that the presence of Treg during  
463   priming to a transplantation antigen increased the affinity of the CD8<sup>+</sup> T cell response  
464   by inhibiting the priming of T cells bearing low affinity TcR via a mechanism

involving CCL3/4 dependent destabilisation of T cell interactions with dendritic cells  
(26).

The therapeutic efficacy of the low-avidity T cell clones was somewhat unexpected since it is generally assumed that high avidity T cells have a competitive advantage in an immune response due to stronger and prolonged activation signals (42, 43). However, in a situation of persistent antigenic stimulation, as is encountered in the tumour, it is likely that these T cells progress to exhaustion as observed in chronic viral infection. Low avidity CTL may escape the same fate through lower expression of PD-1 or by receiving a TcR signal below the threshold required for exhaustion while maintaining some effector function (44, 45).

The identification of low Ka GSW11-specific TcR, which correlate with protection, may have implications for epitope selection in immunotherapy. Current strategies concentrate on the identification and use of tumour epitopes with a high Ka/slow off-rate in an attempt to induce CD8<sup>+</sup> T cell responses with a strong Ka TcR (46-48). This approach has had some success with antigen-specific T cell responses directed to TAA such as NY-ESO-1 and MART-1 and neoantigens. However, only a small proportion of these patients show a partial or complete clinical response (49, 50). These studies show that, while the induction of high-avidity T cells to dominant TAA occur, in a therapeutic setting, it may be more efficacious to induce a broad repertoire of TcR affinities using peptide epitopes presented at sufficient levels regardless of their affinity for MHC. With this in mind, it is notable that the dominant target peptide recognised by TIL in CT26, GSW11, binds weakly to its presenting MHC I, H2-D<sup>d</sup> with a half-life of ~20min at the cell surface, though it is presented in high abundance (17). It will therefore be important to understand the relationship between antigen processing/presentation and the induction of low avidity T cells. For

490 example, algorithms predicting the affinity of candidate peptides could be better  
491 deployed for selecting candidate epitopes for targeted immunotherapy if used in  
492 combination with computational models that take into account antigen abundance and  
493 mechanistic details of the antigen processing pathway.

494    **Acknowledgements**

495    We thank Leon Douglas and Patrick Duriez from the Cancer Research UK ECMC

496    Protein Core Facility for help and advice with tetramer production and Nasia Kontouli

497    for the purification of the PC61 antibodies.

498

# References:

1. Hiraoka, K., M. Miyamoto, Y. Cho, M. Suzuoki, T. Oshikiri, Y. Nakakubo, T. Itoh, T. Ohbuchi, S. Kondo, and H. Katoh. 2006. Concurrent infiltration by CD8+ T cells and CD4+ T cells is a favourable prognostic factor in non-small-cell lung carcinoma. *Br J Cancer* 94: 275-280.
2. Naito, Y., K. Saito, K. Shiiba, A. Ohuchi, K. Saigenji, H. Nagura, and H. Ohtani. 1998. CD8+ T cells infiltrated within cancer cell nests as a prognostic factor in human colorectal cancer. *Cancer Res* 58: 3491-3494.
3. Nakano, O., M. Sato, Y. Naito, K. Suzuki, S. Orikasa, M. Aizawa, Y. Suzuki, I. Shintaku, H. Nagura, and H. Ohtani. 2001. Proliferative activity of intratumoral CD8(+) T-lymphocytes as a prognostic factor in human renal cell carcinoma: clinicopathologic demonstration of antitumor immunity. *Cancer Res* 61: 5132-5136.
4. Pages, F., A. Berger, M. Camus, F. Sanchez-Cabo, A. Costes, R. Molitor, B. Mlecnik, A. Kirilovsky, M. Nilsson, D. Damotte, T. Meatchi, P. Bruneval, P. H. Cugnenc, Z. Trajanoski, W. H. Fridman, and J. Galon. 2005. Effector memory T cells, early metastasis, and survival in colorectal cancer. *N Engl J Med* 353: 2654-2666.
5. Sato, E., S. H. Olson, J. Ahn, B. Bundy, H. Nishikawa, F. Qian, A. A. Jungbluth, D. Frosina, S. Gnjjatic, C. Ambrosone, J. Kepner, T. Odunsi, G. Ritter, S. Lele, Y. T. Chen, H. Ohtani, L. J. Old, and K. Odunsi. 2005. Intraepithelial CD8+ tumor-infiltrating lymphocytes and a high CD8+/regulatory T cell ratio are associated with favorable prognosis in ovarian cancer. *Proc Natl Acad Sci U S A* 102: 18538-18543.
6. Shankaran, V., H. Ikeda, A. T. Bruce, J. M. White, P. E. Swanson, L. J. Old, and R. D. Schreiber. 2001. IFNgamma and lymphocytes prevent primary tumour development and shape tumour immunogenicity. *Nature* 410: 1107-1111.
7. Smyth, M. J., K. Y. Thia, S. E. Street, D. MacGregor, D. I. Godfrey, and J. A. Trapani. 2000. Perforin-mediated cytotoxicity is critical for surveillance of spontaneous lymphoma. *J Exp Med* 192: 755-760.
8. Dunn, G. P., A. T. Bruce, H. Ikeda, L. J. Old, and R. D. Schreiber. 2002. Cancer immunoediting: from immunosurveillance to tumor escape. *Nat Immunol* 3: 991-998.
9. Schreiber, R. D., L. J. Old, and M. J. Smyth. 2011. Cancer immunoediting: integrating immunity's roles in cancer suppression and promotion. *Science* 331: 1565-1570.
10. Dempke, W. C. M., K. Fenchel, P. Uciechowski, and S. P. Dale. 2017. Second- and third-generation drugs for immuno-oncology treatment—The more the better? *European Journal of Cancer* 74: 55-72.
11. Shang, B., Y. Liu, S. J. Jiang, and Y. Liu. 2015. Prognostic value of tumor-infiltrating FoxP3+ regulatory T cells in cancers: a systematic review and meta-analysis. *Sci Rep* 5: 15179.
12. Olson, B. M., and D. G. McNeel. 2013. Monitoring regulatory immune responses in tumor immunotherapy clinical trials. *Front Oncol* 3: 109.
13. Golgher, D., E. Jones, F. Powrie, T. Elliott, and A. Gallimore. 2002. Depletion of CD25+ regulatory cells uncovers immune responses to shared murine tumor rejection antigens. *Eur J Immunol* 32: 3267-3275.



- 547 14. Onizuka, S., I. Tawara, J. Shimizu, S. Sakaguchi, T. Fujita, and E. Nakayama.  
548 1999. Tumor Rejection by *in Vivo* Administration of Anti-CD25  
549 (Interleukin-2 Receptor  $\alpha$ ) Monoclonal Antibody. *Cancer Research* 59: 3128-  
550 3133.
- 551 15. Grosso, J. F., and M. N. Jure-Kunkel. 2013. CTLA-4 blockade in tumor  
552 models: an overview of preclinical and translational research. *Cancer Immun*  
553 13: 5.
- 554 16. Stewart, R., M. Morrow, S. A. Hammond, K. Mulgrew, D. Marcus, E. Poon,  
555 A. Watkins, S. Mullins, M. Chodorge, J. Andrews, D. Bannister, E. Dick, N.  
556 Crawford, J. Parmentier, M. Alimzhanov, J. S. Babcook, I. N. Foltz, A.  
557 Buchanan, V. Bedian, R. W. Wilkinson, and M. McCourt. 2015. Identification  
558 and Characterization of MEDI4736, an Antagonistic Anti-PD-L1 Monoclonal  
559 Antibody. *Cancer Immunol Res* 3: 1052-1062.
- 560 17. James, E., A. Yeh, C. King, F. Korangy, I. Bailey, D. S. Boulanger, B. J. Van  
561 den Eynde, N. Murray, and T. J. Elliott. 2010. Differential suppression of  
562 tumor-specific CD8<sup>+</sup> T cells by regulatory T cells. *J Immunol* 185: 5048-  
563 5055.
- 564 18. Huang, A. Y., P. H. Gulden, A. S. Woods, M. C. Thomas, C. D. Tong, W.  
565 Wang, V. H. Engelhard, G. Pasternack, R. Cotter, D. Hunt, D. M. Pardoll, and  
566 E. M. Jaffee. 1996. The immunodominant major histocompatibility complex  
567 class I-restricted antigen of a murine colon tumor derives from an endogenous  
568 retroviral gene product. *Proc Natl Acad Sci U S A* 93: 9730-9735.
- 569 19. Truscott, S. M., L. Lybarger, J. M. Martinko, V. E. Mitaksov, D. M. Kranz, J.  
570 M. Connolly, D. H. Fremont, and T. H. Hansen. 2007. Disulfide bond  
571 engineering to trap peptides in the MHC class I binding groove. *J Immunol*  
572 178: 6280-6289.
- 573 20. Duraiswamy, J., G. J. Freeman, and G. Coukos. 2013. Therapeutic PD-1  
574 pathway blockade augments with other modalities of immunotherapy T-cell  
575 function to prevent immune decline in ovarian cancer. *Cancer Res* 73: 6900-  
576 6912.
- 577 21. Sakuishi, K., L. Apetoh, J. M. Sullivan, B. R. Blazar, V. K. Kuchroo, and A.  
578 C. Anderson. 2010. Targeting Tim-3 and PD-1 pathways to reverse T cell  
579 exhaustion and restore anti-tumor immunity. *J Exp Med* 207: 2187-2194.
- 580 22. Wherry, E. J., and M. Kurachi. 2015. Molecular and cellular insights into T  
581 cell exhaustion. *Nat Rev Immunol* 15: 486-499.
- 582 23. Gajewski, T. F., H. Schreiber, and Y. X. Fu. 2013. Innate and adaptive  
583 immune cells in the tumor microenvironment. *Nat Immunol* 14: 1014-1022.
- 584 24. Marvel, D., and D. I. Gabrilovich. 2015. Myeloid-derived suppressor cells in  
585 the tumor microenvironment: expect the unexpected. *J Clin Invest* 125: 3356-  
586 3364.
- 587 25. Agata, Y., A. Kawasaki, H. Nishimura, Y. Ishida, T. Tsubata, H. Yagita, and  
588 T. Honjo. 1996. Expression of the PD-1 antigen on the surface of stimulated  
589 mouse T and B lymphocytes. *Int Immunol* 8: 765-772.
- 590 26. Pace, L., A. Tempez, C. Arnold-Schrauf, F. Lemaitre, P. Bousso, L. Fetler, T.  
591 Sparwasser, and S. Amigorena. 2012. Regulatory T cells increase the avidity  
592 of primary CD8<sup>+</sup> T cell responses and promote memory. *Science* 338: 532-  
593 536.
- 594 27. Holmberg, K., S. Mariathasan, T. Ohteki, P. S. Ohashi, and N. R. Gascoigne.  
595 2003. TCR binding kinetics measured with MHC class I tetramers reveal a

- 596 positive selecting peptide with relatively high affinity for TCR. *J Immunol*  
597 171: 2427-2434.
- 598 28. Schietinger, A., and P. D. Greenberg. 2014. Tolerance and exhaustion:  
599 defining mechanisms of T cell dysfunction. *Trends Immunol* 35: 51-60.
- 600 29. Gajewski, T. F., J. Louahed, and V. G. Brichard. 2010. Gene signature in  
601 melanoma associated with clinical activity: a potential clue to unlock cancer  
602 immunotherapy. *Cancer J* 16: 399-403.
- 603 30. Spranger, S., J. J. Luke, R. Bao, Y. Zha, K. M. Hernandez, Y. Li, A. P.  
604 Gajewski, J. Andrade, and T. F. Gajewski. 2016. Density of immunogenic  
605 antigens does not explain the presence or absence of the T-cell-inflamed tumor  
606 microenvironment in melanoma. *Proc Natl Acad Sci U S A* 113: E7759-  
607 E7768.
- 608 31. Spranger, S., R. M. Spaapen, Y. Zha, J. Williams, Y. Meng, T. T. Ha, and T.  
609 F. Gajewski. 2013. Up-regulation of PD-L1, IDO, and T(regs) in the  
610 melanoma tumor microenvironment is driven by CD8(+) T cells. *Sci Transl*  
611 *Med* 5: 200ra116.
- 612 32. Lechner, M. G., S. S. Karimi, K. Barry-Holson, T. E. Angell, K. A. Murphy,  
613 C. H. Church, J. R. Ohlfest, P. Hu, and A. L. Epstein. 2013. Immunogenicity  
614 of murine solid tumor models as a defining feature of in vivo behavior and  
615 response to immunotherapy. *J Immunother* 36: 477-489.
- 616 33. Murphy, K. A., M. G. Lechner, F. E. Popescu, J. Bedi, S. A. Decker, P. Hu, J.  
617 R. Erickson, M. G. O'Sullivan, L. Swier, A. M. Salazar, M. R. Olin, A. L.  
618 Epstein, and J. R. Ohlfest. 2012. An in vivo immunotherapy screen of  
619 costimulatory molecules identifies Fc-OX40L as a potent reagent for the  
620 treatment of established murine gliomas. *Clin Cancer Res* 18: 4657-4668.
- 621 34. Chikuma, S., S. Terawaki, T. Hayashi, R. Nabeshima, T. Yoshida, S.  
622 Shibayama, T. Okazaki, and T. Honjo. 2009. PD-1-mediated suppression of  
623 IL-2 production induces CD8+ T cell anergy in vivo. *J Immunol* 182: 6682-  
624 6689.
- 625 35. De Simone, M., A. Arrigoni, G. Rossetti, P. Gruarin, V. Ranzani, C. Politano,  
626 R. J. Bonnal, E. Provati, M. L. Sarnicola, I. Panzeri, M. Moro, M. Crosti, S.  
627 Mazzara, V. Vaira, S. Bosari, A. Pallechi, L. Santambrogio, G. Bovo, N.  
628 Zucchini, M. Totis, L. Gianotti, G. Cesana, R. A. Perego, N. Maroni, A. Pisani  
629 Ceretti, E. Opocher, R. De Francesco, J. Geginat, H. G. Stunnenberg, S.  
630 Abrignani, and M. Pagani. 2016. Transcriptional Landscape of Human Tissue  
631 Lymphocytes Unveils Uniqueness of Tumor-Infiltrating T Regulatory Cells.  
632 *Immunity* 45: 1135-1147.
- 633 36. Plitas, G., C. Konopacki, K. Wu, P. D. Bos, M. Morrow, E. V. Putintseva, D.  
634 M. Chudakov, and A. Y. Rudensky. 2016. Regulatory T Cells Exhibit Distinct  
635 Features in Human Breast Cancer. *Immunity* 45: 1122-1134.
- 636 37. Rech, A. J., and R. H. Vonderheide. 2009. Clinical use of anti-CD25 antibody  
637 daclizumab to enhance immune responses to tumor antigen vaccination by  
638 targeting regulatory T cells. *Ann N Y Acad Sci* 1174: 99-106.
- 639 38. Jacobs, J. F., C. J. Punt, W. J. Lesterhuis, R. P. Suttmuller, H. M. Brouwer, N.  
640 M. Scharenborg, I. S. Klasen, L. B. Hilbrands, C. G. Figdor, I. J. de Vries, and  
641 G. J. Adema. 2010. Dendritic cell vaccination in combination with anti-CD25  
642 monoclonal antibody treatment: a phase I/II study in metastatic melanoma  
643 patients. *Clin Cancer Res* 16: 5067-5078.
- 644 39. Zappasodi, R., Y. Li, M. Abu-Akeel, J. Qi, P. Wong, C. Sirard, M. Postow, D.  
645 A. Schaer, W. Newman, H. Koon, V. Velcheti, M. K. Callahan, J. D.

- 646 Wolchok, and T. Merghoub. 2017. Intratumor and peripheral Treg modulation  
647 as a pharmacodynamic biomarker of the GITR agonist antibody TRX-518 in  
648 the first in-human trial [abstract]. *In: Proceedings of the Annual Meeting of*  
649 *the American Association for Cancer Research; 2017 Apr 1-5; Washington,*  
650 *DC: AACR; 2017: Abstract nr CT018.*
- 651 40. Telang, S., M. A. Rasku, A. L. Clem, K. Carter, A. C. Klarer, W. R. Badger,  
652 R. A. Milam, S. N. Rai, J. Pan, H. Gragg, B. F. Clem, K. M. McMasters, D.  
653 M. Miller, and J. Chesney. 2011. Phase II trial of the regulatory T cell-  
654 depleting agent, denileukin diftitox, in patients with unresectable stage IV  
655 melanoma. *BMC Cancer* 11: 515.
- 656 41. Ganesan, A. P., J. Clarke, O. Wood, E. M. Garrido-Martin, S. J. Chee, T.  
657 Mellows, D. Samaniego-Castruita, D. Singh, G. Seumois, A. Alzetani, E.  
658 Woo, P. S. Friedmann, E. V. King, G. J. Thomas, T. Sanchez-Elsner, P.  
659 Vijayanand, and C. H. Ottensmeier. 2017. Tissue-resident memory features  
660 are linked to the magnitude of cytotoxic T cell responses in human lung  
661 cancer. *Nat Immunol* 18: 940-950.
- 662 42. Busch, D. H., and E. G. Pamer. 1999. T cell affinity maturation by selective  
663 expansion during infection. *J Exp Med* 189: 701-710.
- 664 43. Zehn, D., S. Y. Lee, and M. J. Bevan. 2009. Complete but curtailed T-cell  
665 response to very low-affinity antigen. *Nature* 458: 211-214.
- 666 44. Conrad, J. A., R. K. Ramalingam, R. M. Smith, L. Barnett, S. L. Lorey, J.  
667 Wei, B. C. Simons, S. Sadagopal, D. Meyer-Olson, and S. A. Kalams. 2011.  
668 Dominant clonotypes within HIV-specific T cell responses are programmed  
669 death-1high and CD127low and display reduced variant cross-reactivity. *J*  
670 *Immunol* 186: 6871-6885.
- 671 45. Harari, A., C. Cellera, F. Bellutti Enders, J. Kostler, L. Codarri, G. Tapia, O.  
672 Boyman, E. Castro, S. Gaudieri, I. James, M. John, R. Wagner, S. Mallal, and  
673 G. Pantaleo. 2007. Skewed association of polyfunctional antigen-specific CD8  
674 T cell populations with HLA-B genotype. *Proc Natl Acad Sci U S A* 104:  
675 16233-16238.
- 676 46. Castle, J. C., S. Kreiter, J. Diekmann, M. Löwer, N. van de Roemer, J. de  
677 Graaf, A. Selmi, M. Diken, S. Boegel, C. Paret, M. Koslowski, A. N. Kuhn, C.  
678 M. Britten, C. Huber, Ö. Türeci, and U. Sahin. 2012. Exploiting the  
679 Mutanome for Tumor Vaccination. *Cancer Research* 72: 1081-1091.
- 680 47. Robbins, P. F., Y.-C. Lu, M. El-Gamil, Y. F. Li, C. Gross, J. Gartner, J. C.  
681 Lin, J. K. Teer, P. Clifton, E. Tycksen, Y. Samuels, and S. A. Rosenberg.  
682 2013. Mining Exomic Sequencing Data to Identify Mutated Antigens  
683 Recognized by Adoptively Transferred Tumor-reactive T cells. *Nature*  
684 *medicine* 19: 747-752.
- 685 48. Rooij, N. v., M. M. v. Buuren, D. Philips, A. Velds, M. Toebes, B.  
686 Heemskerk, L. J. A. v. Dijk, S. Behjati, H. Hilkmann, D. e. Atmioui, M.  
687 Nieuwland, M. R. Stratton, R. M. Kerkhoven, C. Keşmir, J. B. Haanen, P.  
688 Kvistborg, and T. N. Schumacher. 2013. Tumor Exome Analysis Reveals  
689 Neoantigen-Specific T-Cell Reactivity in an Ipilimumab-Responsive  
690 Melanoma. *Journal of Clinical Oncology* 31: e439-e442.
- 691 49. Carreno, B. M., V. Magrini, M. Becker-Hapak, S. Kaabinejadian, J. Hundal,  
692 A. A. Petti, A. Ly, W. R. Lie, W. H. Hildebrand, E. R. Mardis, and G. P.  
693 Linette. 2015. Cancer immunotherapy. A dendritic cell vaccine increases the  
694 breadth and diversity of melanoma neoantigen-specific T cells. *Science* 348:  
695 803-808.

- 696 50. Rosenberg, S. A., J. C. Yang, and N. P. Restifo. 2004. Cancer immunotherapy:  
697 moving beyond current vaccines. *Nat Med* 10: 909-915.  
698  
699

## Figure Legends

**Figure 1. The majority of tumour infiltrating GSW11-specific T cells are non-functional.** Balb/c mice were challenged with CT26 tumour cells and the presence of tumour infiltrating AH1- and GSW11-specific T cells was assessed over the indicated time course. (A) Assessment of AH1- and GSW11-specific T cells using tetramer/dextramer and IFN- $\gamma$  production at d10 and d22. (B) Percentage of antigen-specific T cells detected by tetramer/dextramer. (C) Diagram representing the tumour size (diameter) and relative proportions of antigen-specific tumour infiltrating T cells over time. (D) Percentage of functional AH1- and GSW11-specific CD8<sup>+</sup> T cells. (E) Relative proportion of functional and non-functional antigen-specific tumour infiltrating T cells. (B, D; mean and s.e.m. of three mice at each time point; \*  $p < 0.05$ , \*\*\*  $p < 0.001$ ).

**Figure 2. GSW11-specific T cells are exhausted in tumour challenged mice.** (A) A representative histogram showing PD-1 expression of functional and non-functional AH1- and GSW11-specific T cells. (B, C) Percentage of PD-1 expressing tumour infiltrating non-functional (B) and functional (C) AH1- and GSW11-specific T cells (B, C; mean and s.e.m. of at least three mice from two independent experiments; \*\*\*  $p < 0.001$ ).

**Figure 3. Expression of PD-1 and PD-L1 on tumour infiltrating and LN resident regulatory T cells and tumour cells.** (A) Percentage of tumour infiltrating Tregs over time. (B, C) Expression of PD-L1 (B) and PD-1 (C) on Tregs in tumours and tumour draining LN. (D) Percentage and level of PD-L1 expression on CT26 tumour

cells prior to and during tumour challenge. (A-C; mean and s.e.m. of three mice at the indicated time points).

**Figure 4. Exhaustion of anti-tumour T cells is induced in the periphery and regulated by regulatory T cells.** Treg replete or depleted Balb/c mice were challenged with CT26 and anti-tumour T cell responses in spleens and tumour draining LN assessed. (A) A representative histogram showing the relative level of PD-1 expression on AH1- and GSW11-specific T cells as indicated. (B, C) Percentage of functional GSW11- (B) or AH1- (C) specific T cells in spleen and tdLN in Treg replete and depleted mice following tumour challenge over the indicated time course. (D-G) Proportion of PD-1 expressing non-functional (D, E) and functional (F, G) anti-GSW11 (D, F) or -AH1 (E, G) T cells in spleen and tumour draining LN in Treg replete and depleted mice following tumour challenge. (B-G; mean and s.e.m. of three mice at the indicated time points; d25 data only available for Treg depleted samples).

**Figure 5. GSW11-specific T cell clonalities are modulated by regulatory T cells.** Treg replete or depleted Balb/c mice were challenged with CT26 and the TcR expression of GSW11-specific T cells assessed. (A) Percentage of GSW11-specific CD8<sup>+</sup> T cells expressing the indicating TcR V $\beta$  in Treg replete or depleted CT26 challenged mice. (B) The relative proportion of TcR V $\beta$  usage in GSW11-specific T cells following tumour challenge (blue segments indicate TcR with high avidity and red indicate those with low avidity). (A; mean and s.e.m. of ten mice in three pools, B; mean of ten mice from three pools; \*  $p < 0.05$ , \*\*  $p < 0.01$ ).

**Figure 6. Tumour protective GSW11-specific CD8<sup>+</sup> T cells have low TcR avidity.**

The TcR avidity of anti-GSW11 T cell oligoclones that showed either increased, decreased, or similar levels in tumour challenged Treg depleted mice was assessed using tetramer competition. (A, B) A representative histogram (A) and analysis of relative change in tetramer MFI (B) of the TcR tetramer competition assay in indicated TcR clones. (C) Relative avidity of indicated GSW11-specific T cell oligoclones following tetramer competition (C; mean and s.e.m. of at least three independent experiments; \*  $p < 0.05$ , \*\*  $p < 0.01$ , \*\*\*\*  $p < 0.0001$ ).

Figure 1

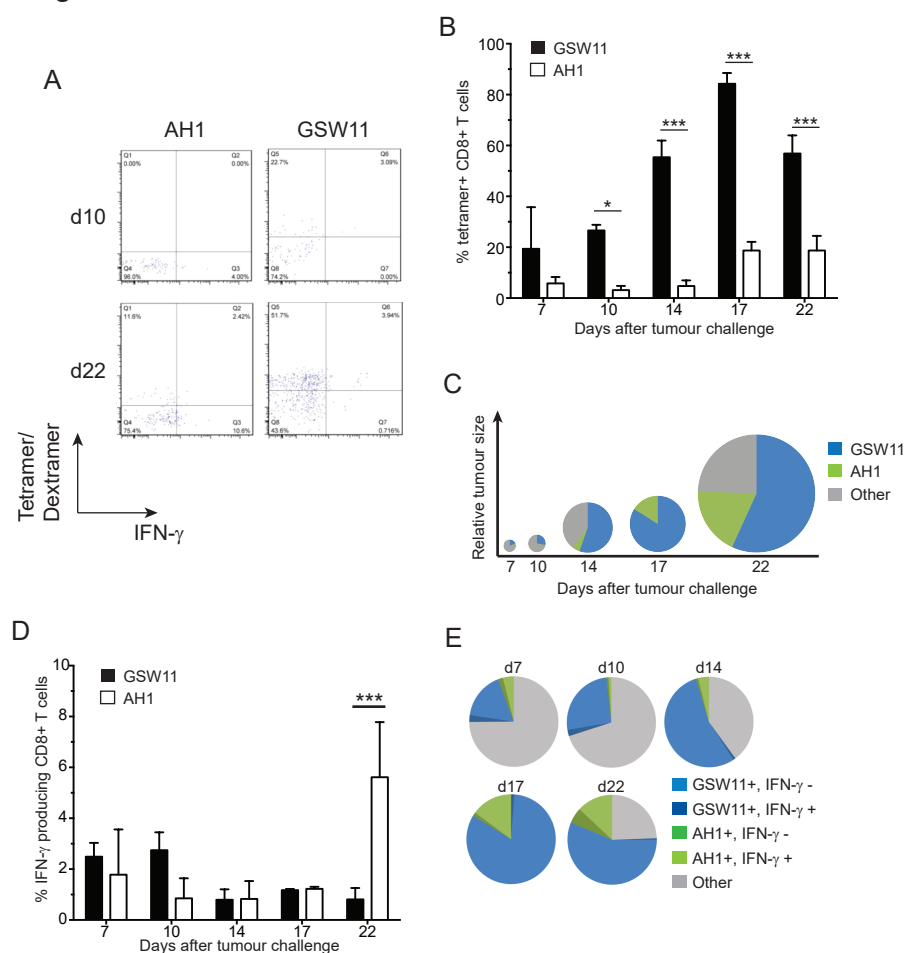



## Figure 2

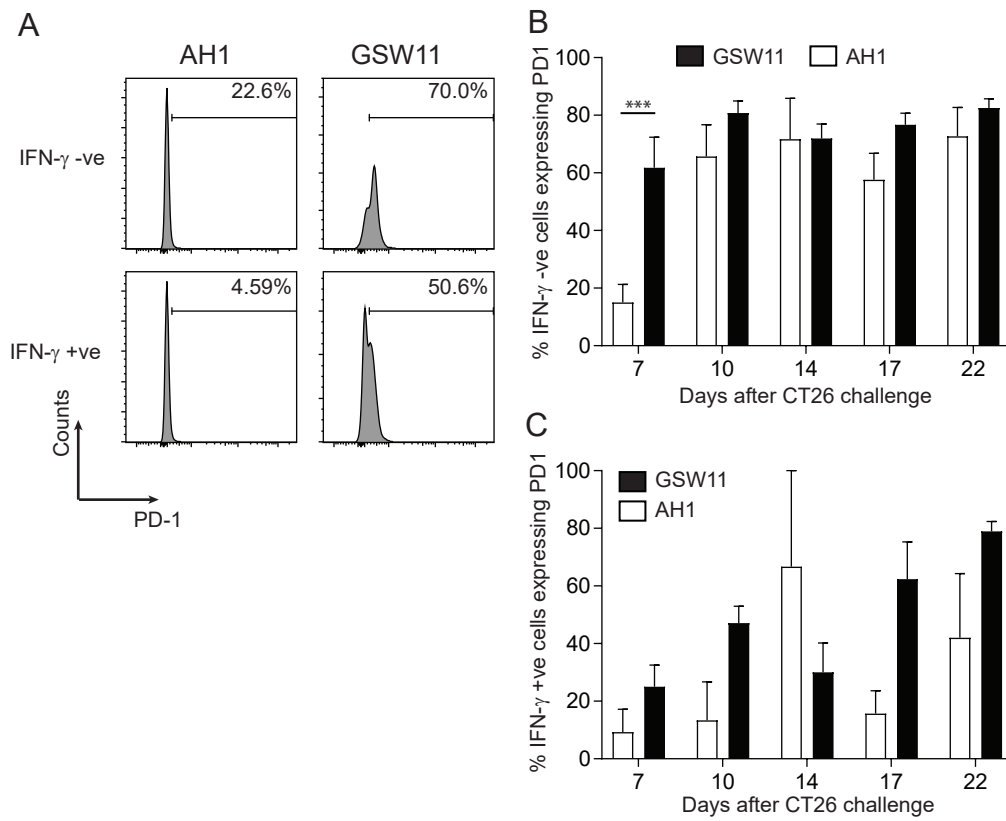

# Figure 3

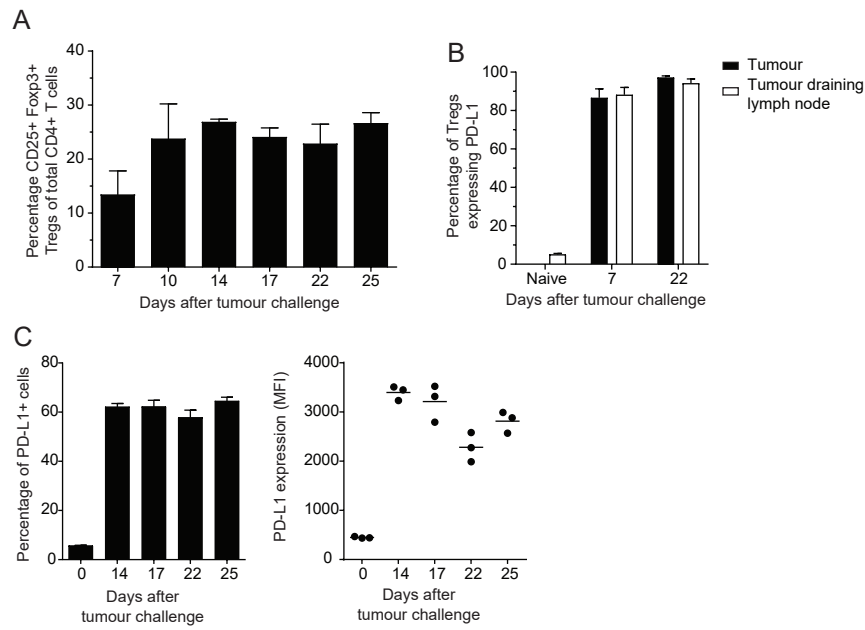

Figure 4

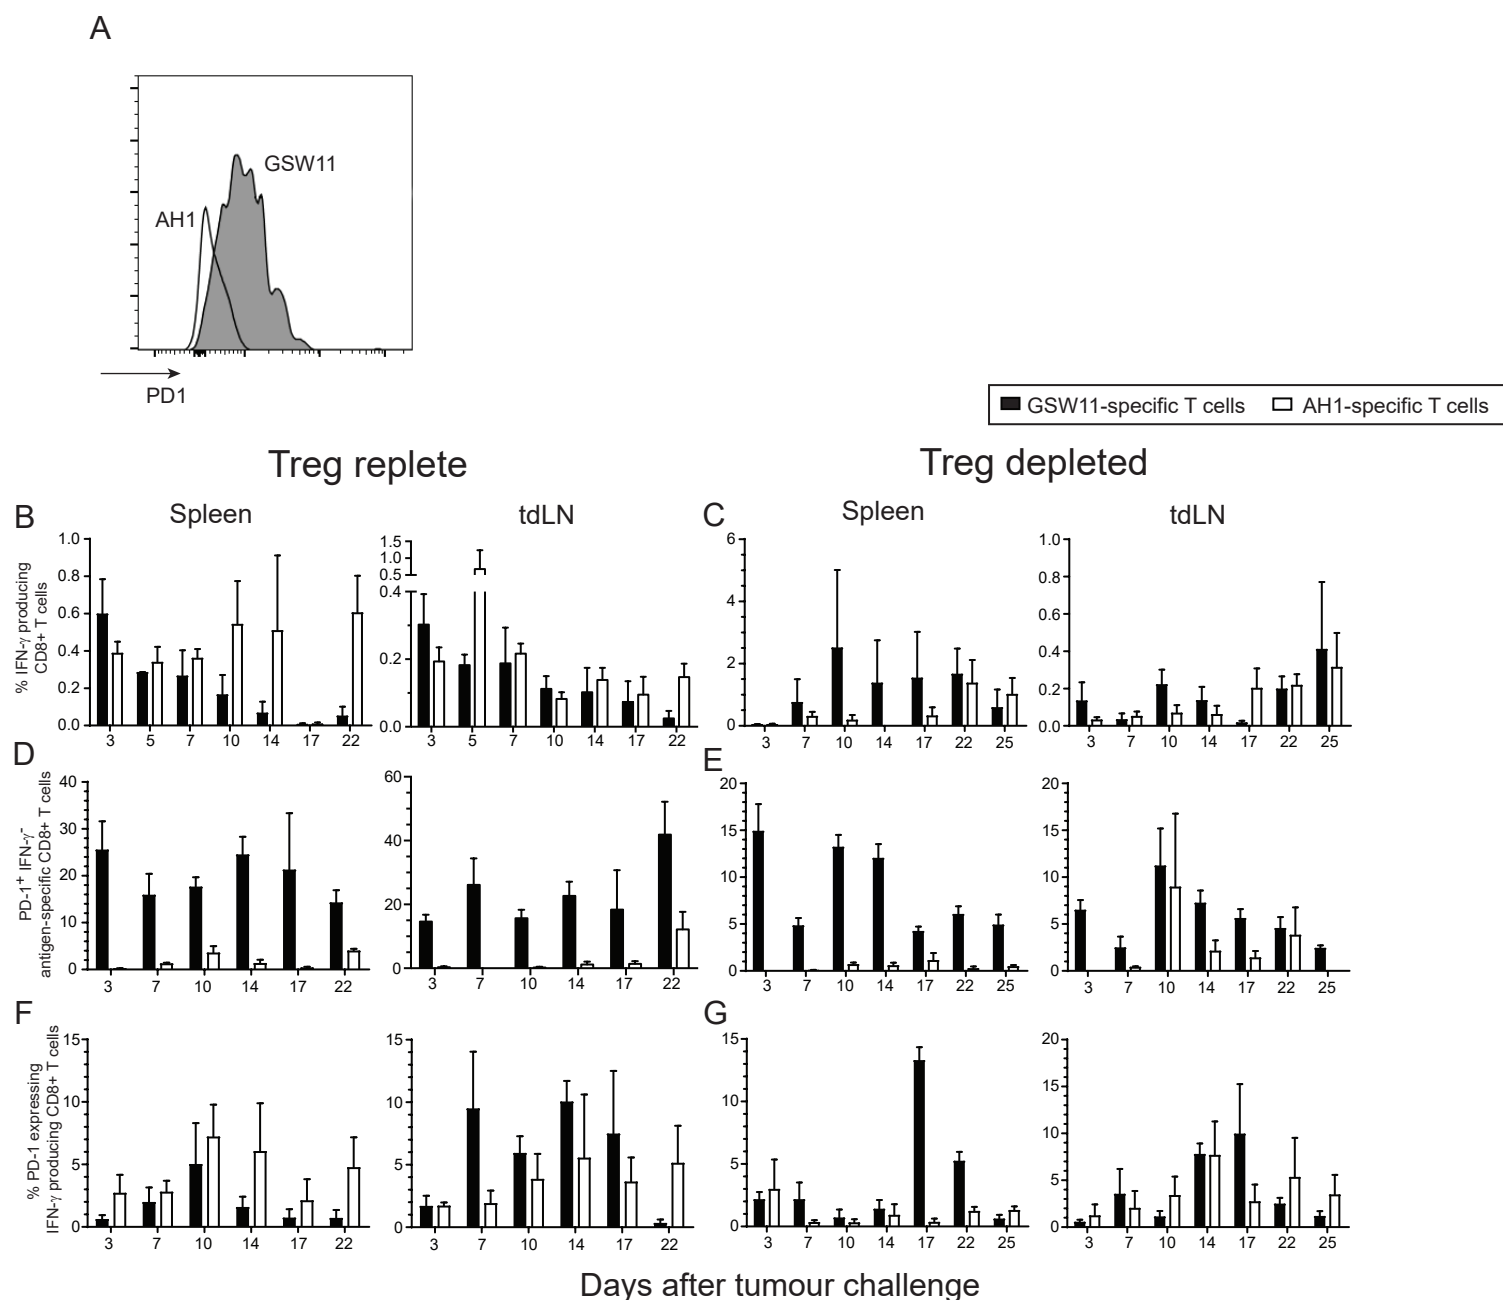

Figure 5

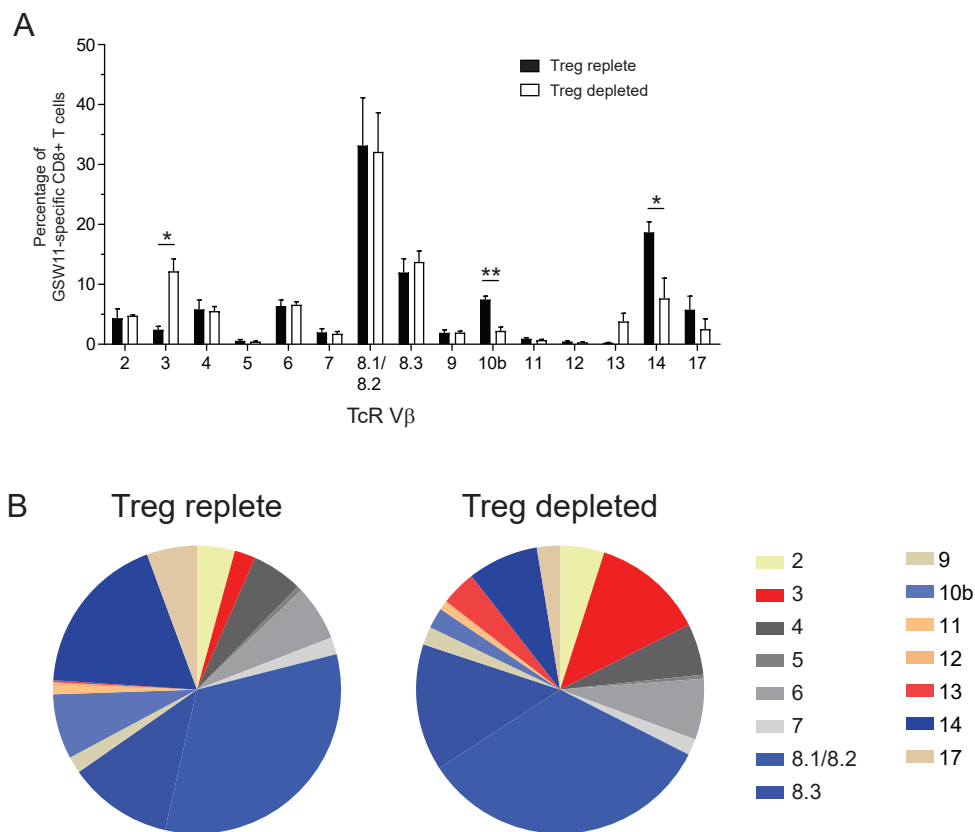

Figure 6

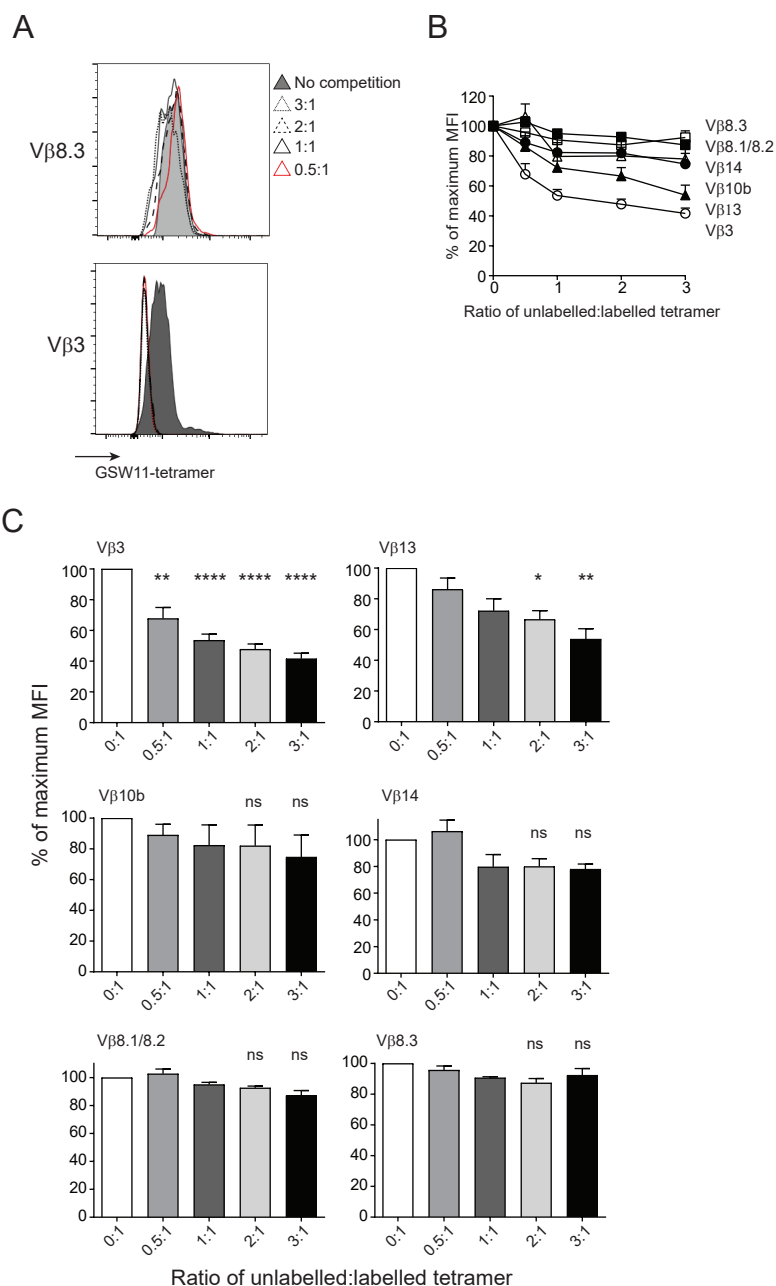

Source: https://www.biorxiv.org/content/10.1101/481515v1.full.pdf
